# Supplementary material
Source: PubMed Central journal article supplement (PMC9208301)
Supplement: NIHMS1814611-supplement-Figure_S7.pdf [file NIHMS1814611-supplement-Figure_S7.pdf]

**A**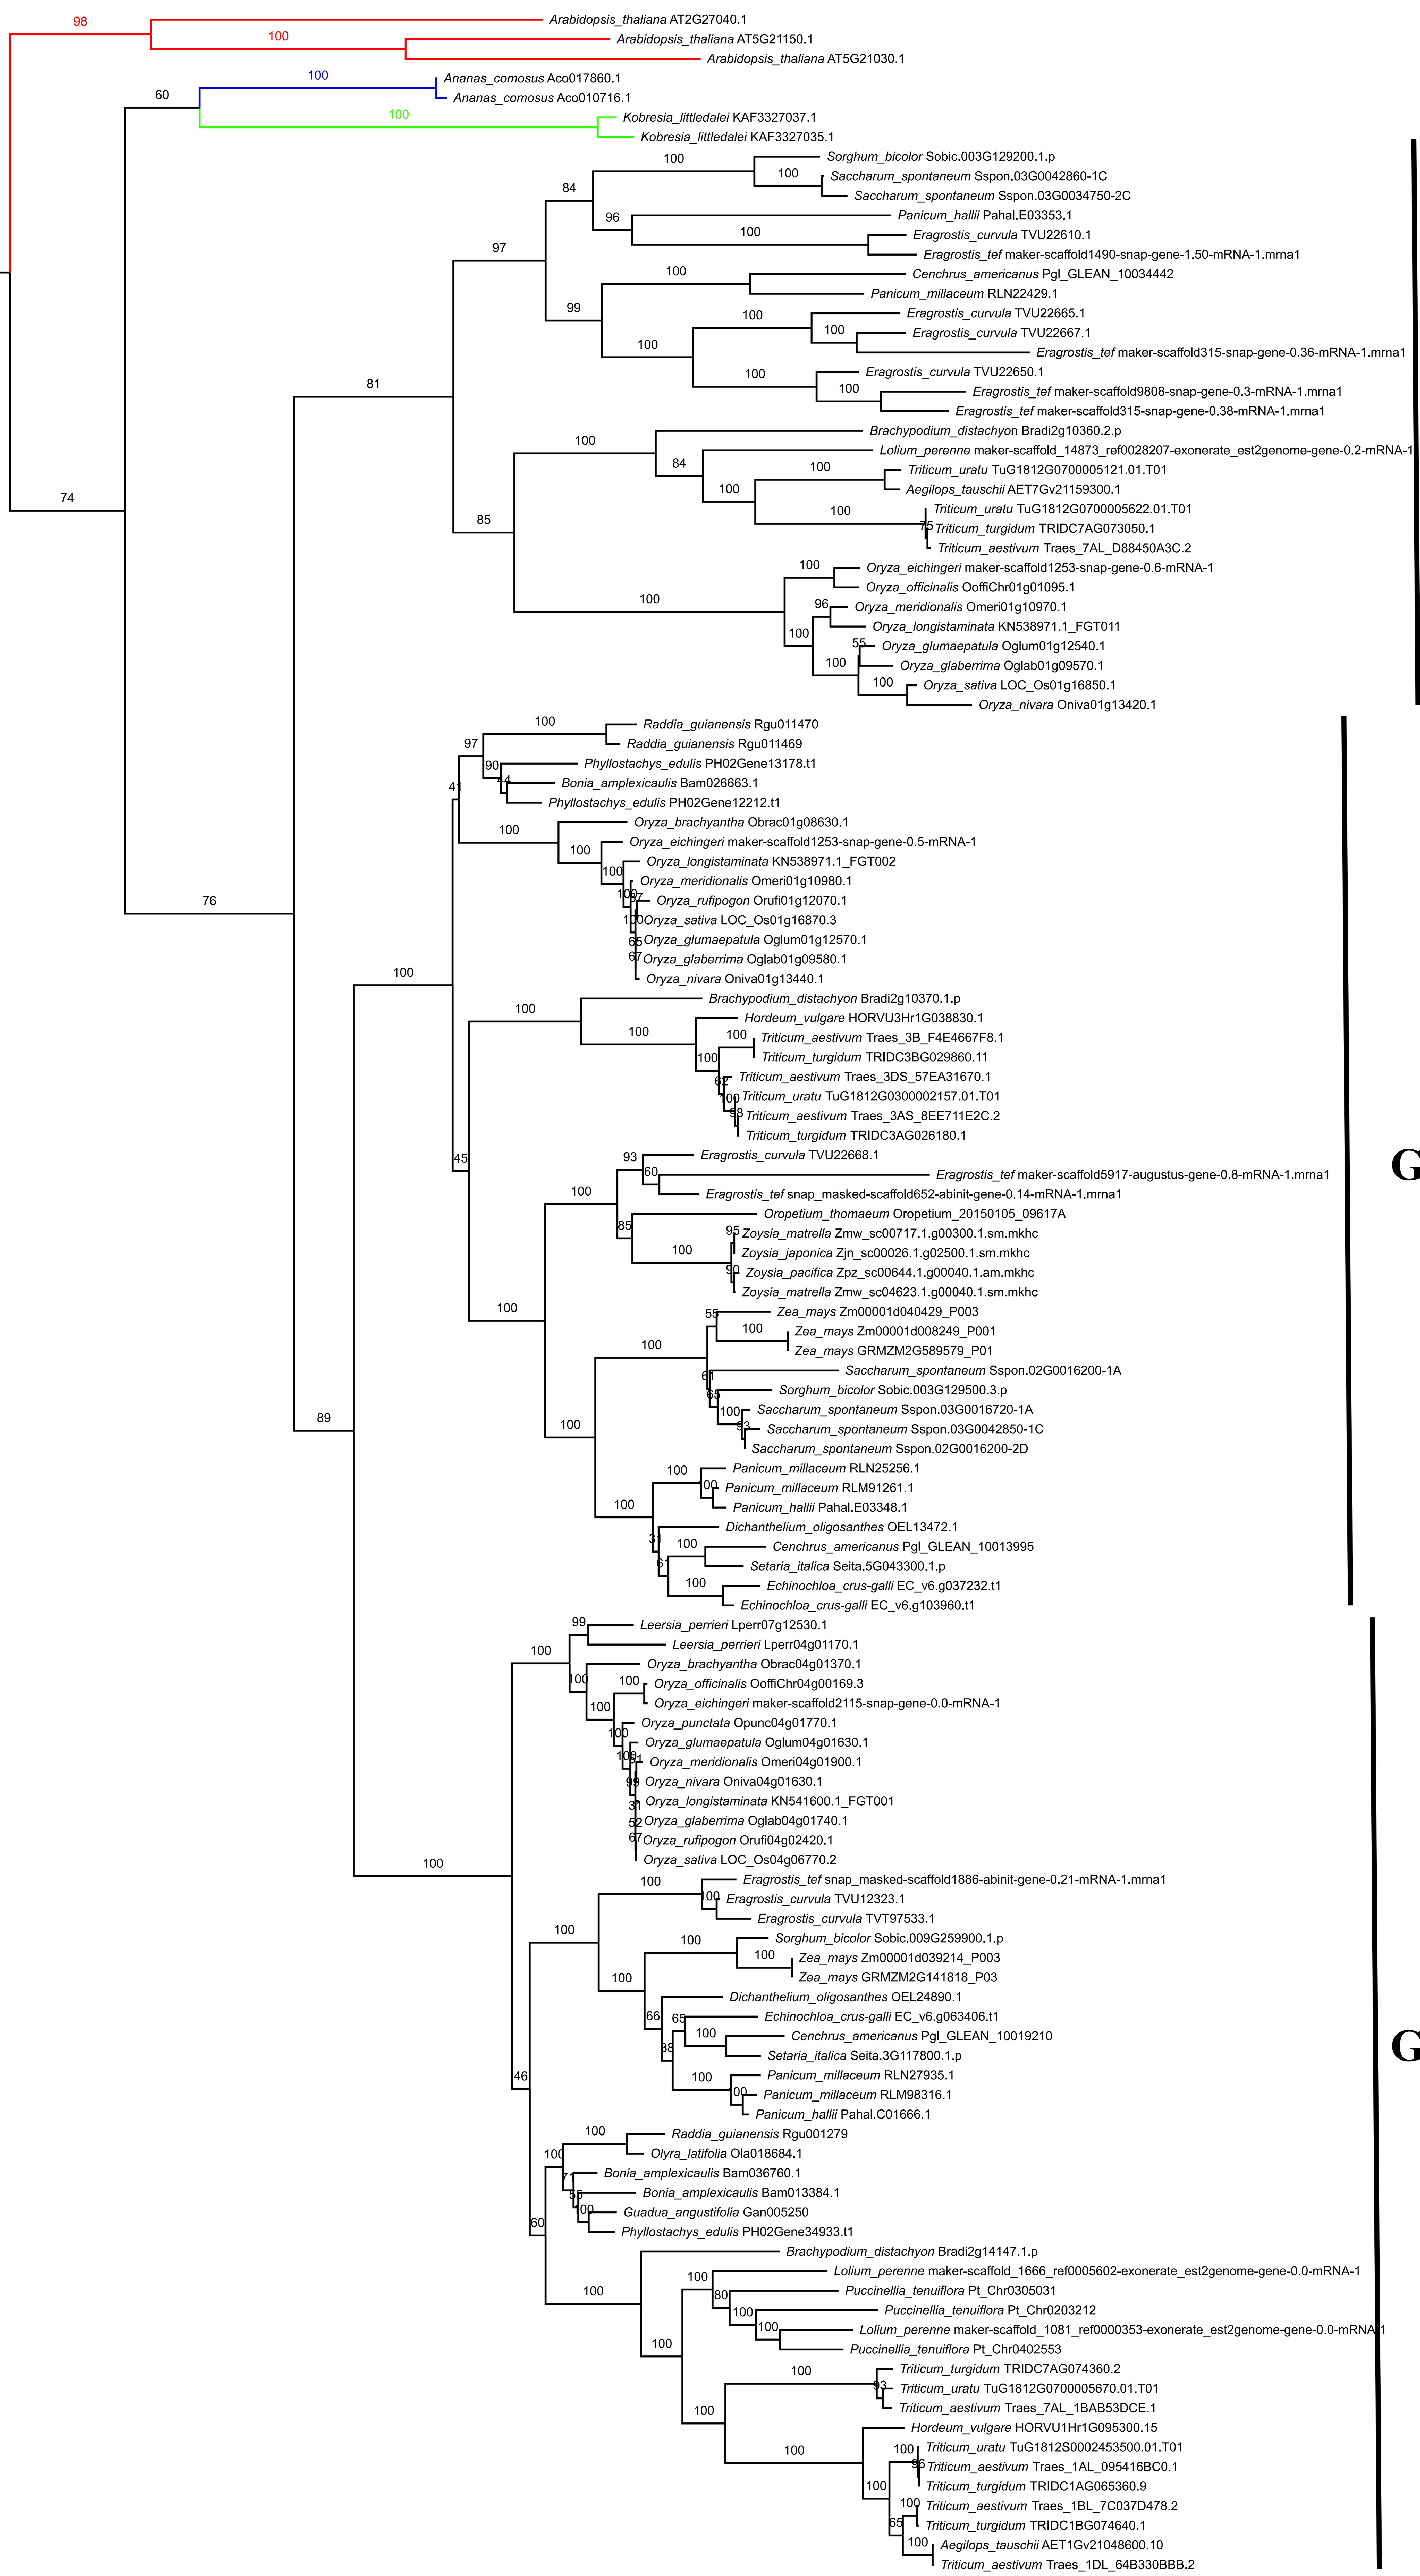**Group I****Group II****Group III**

**B**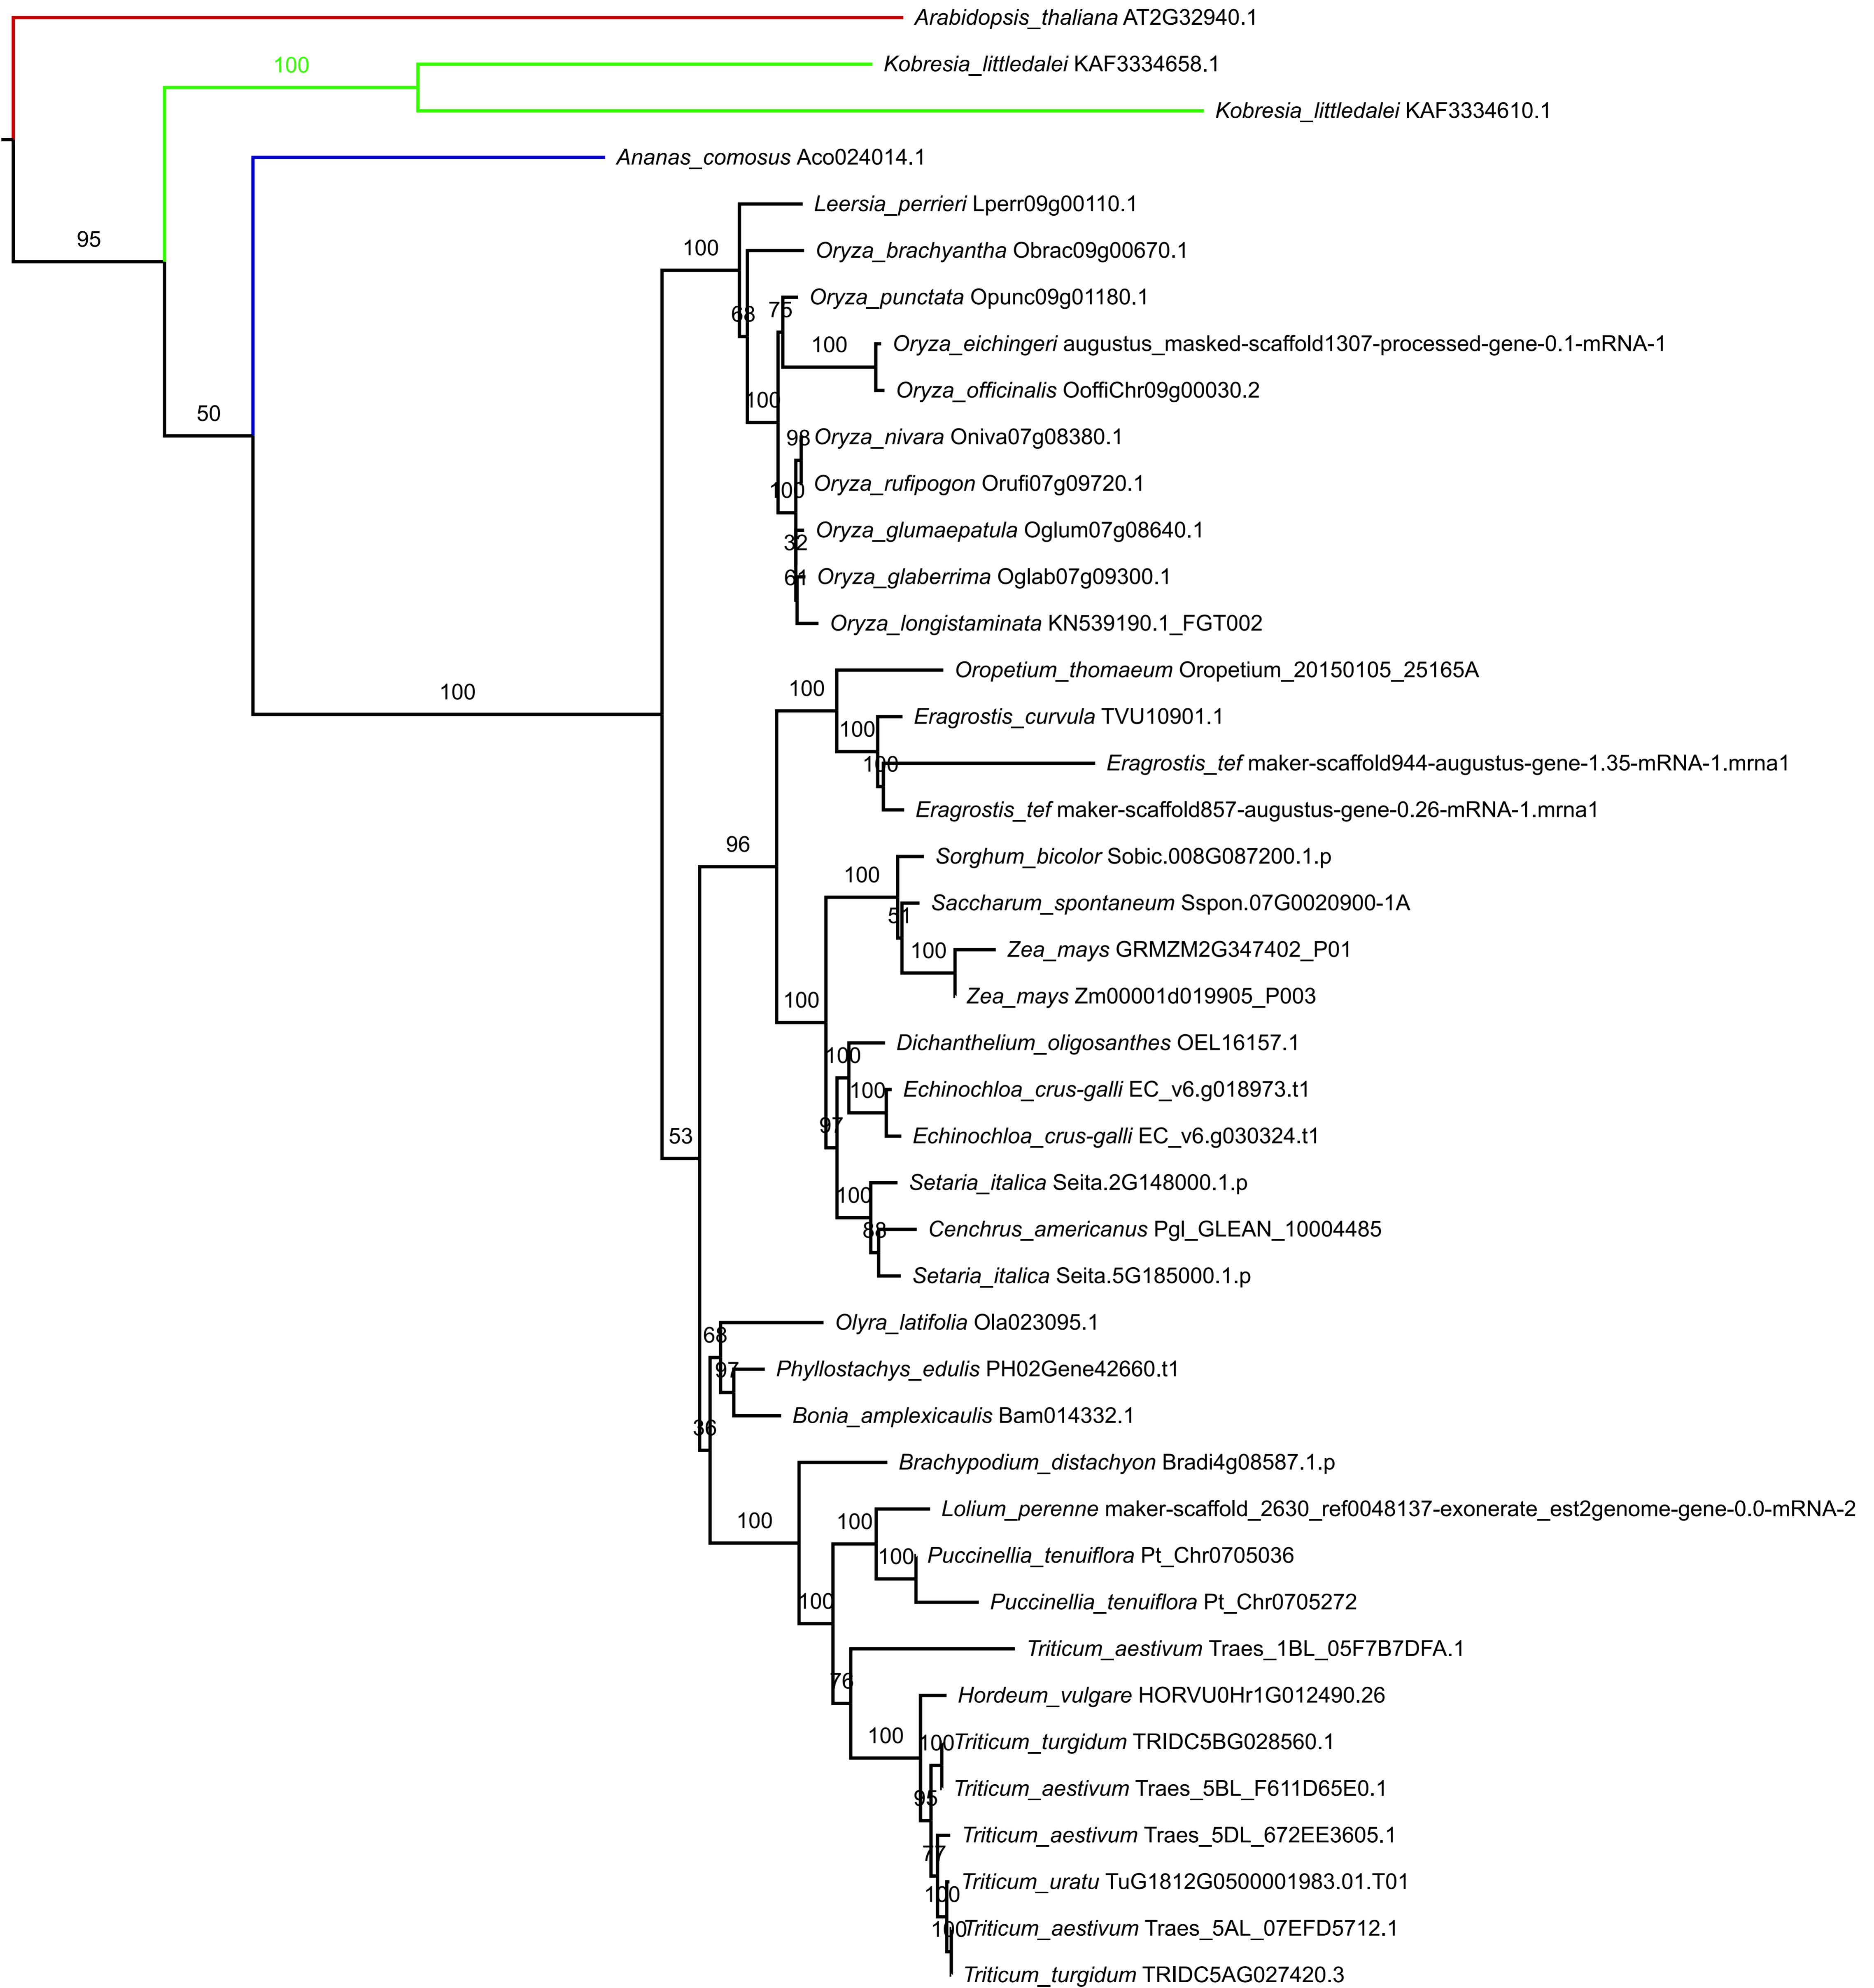

0.06

C

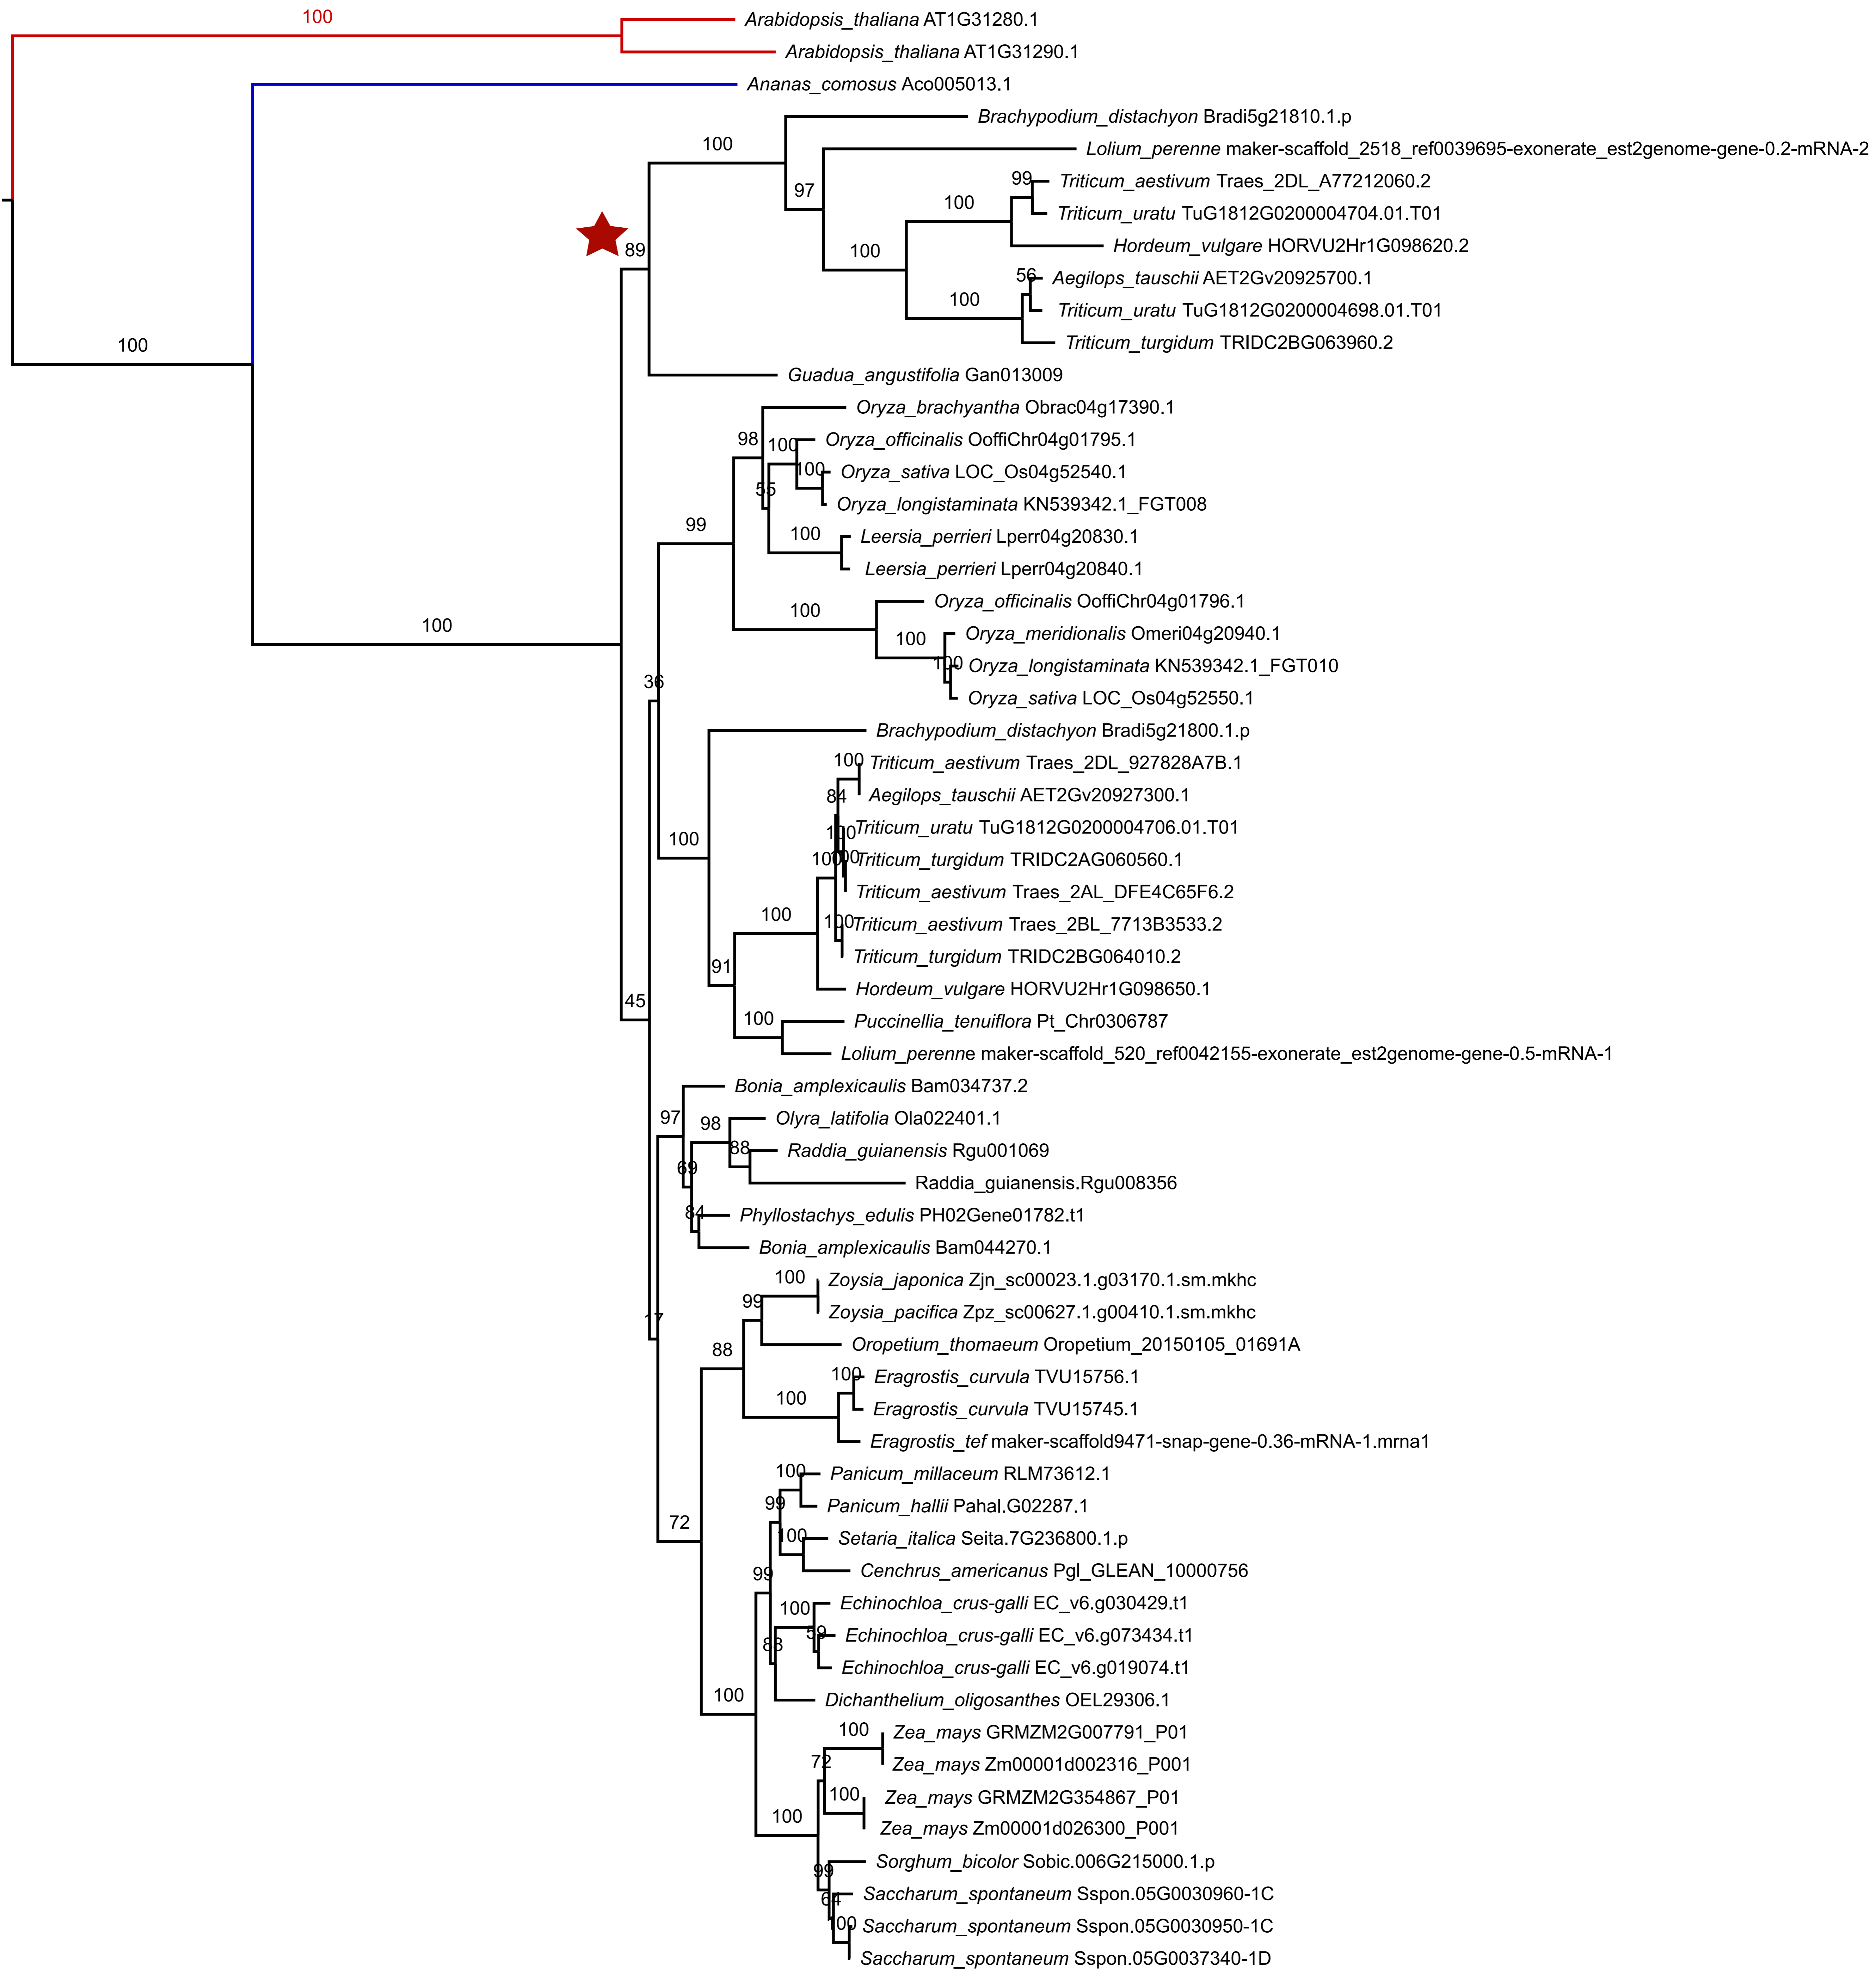

0.1

D

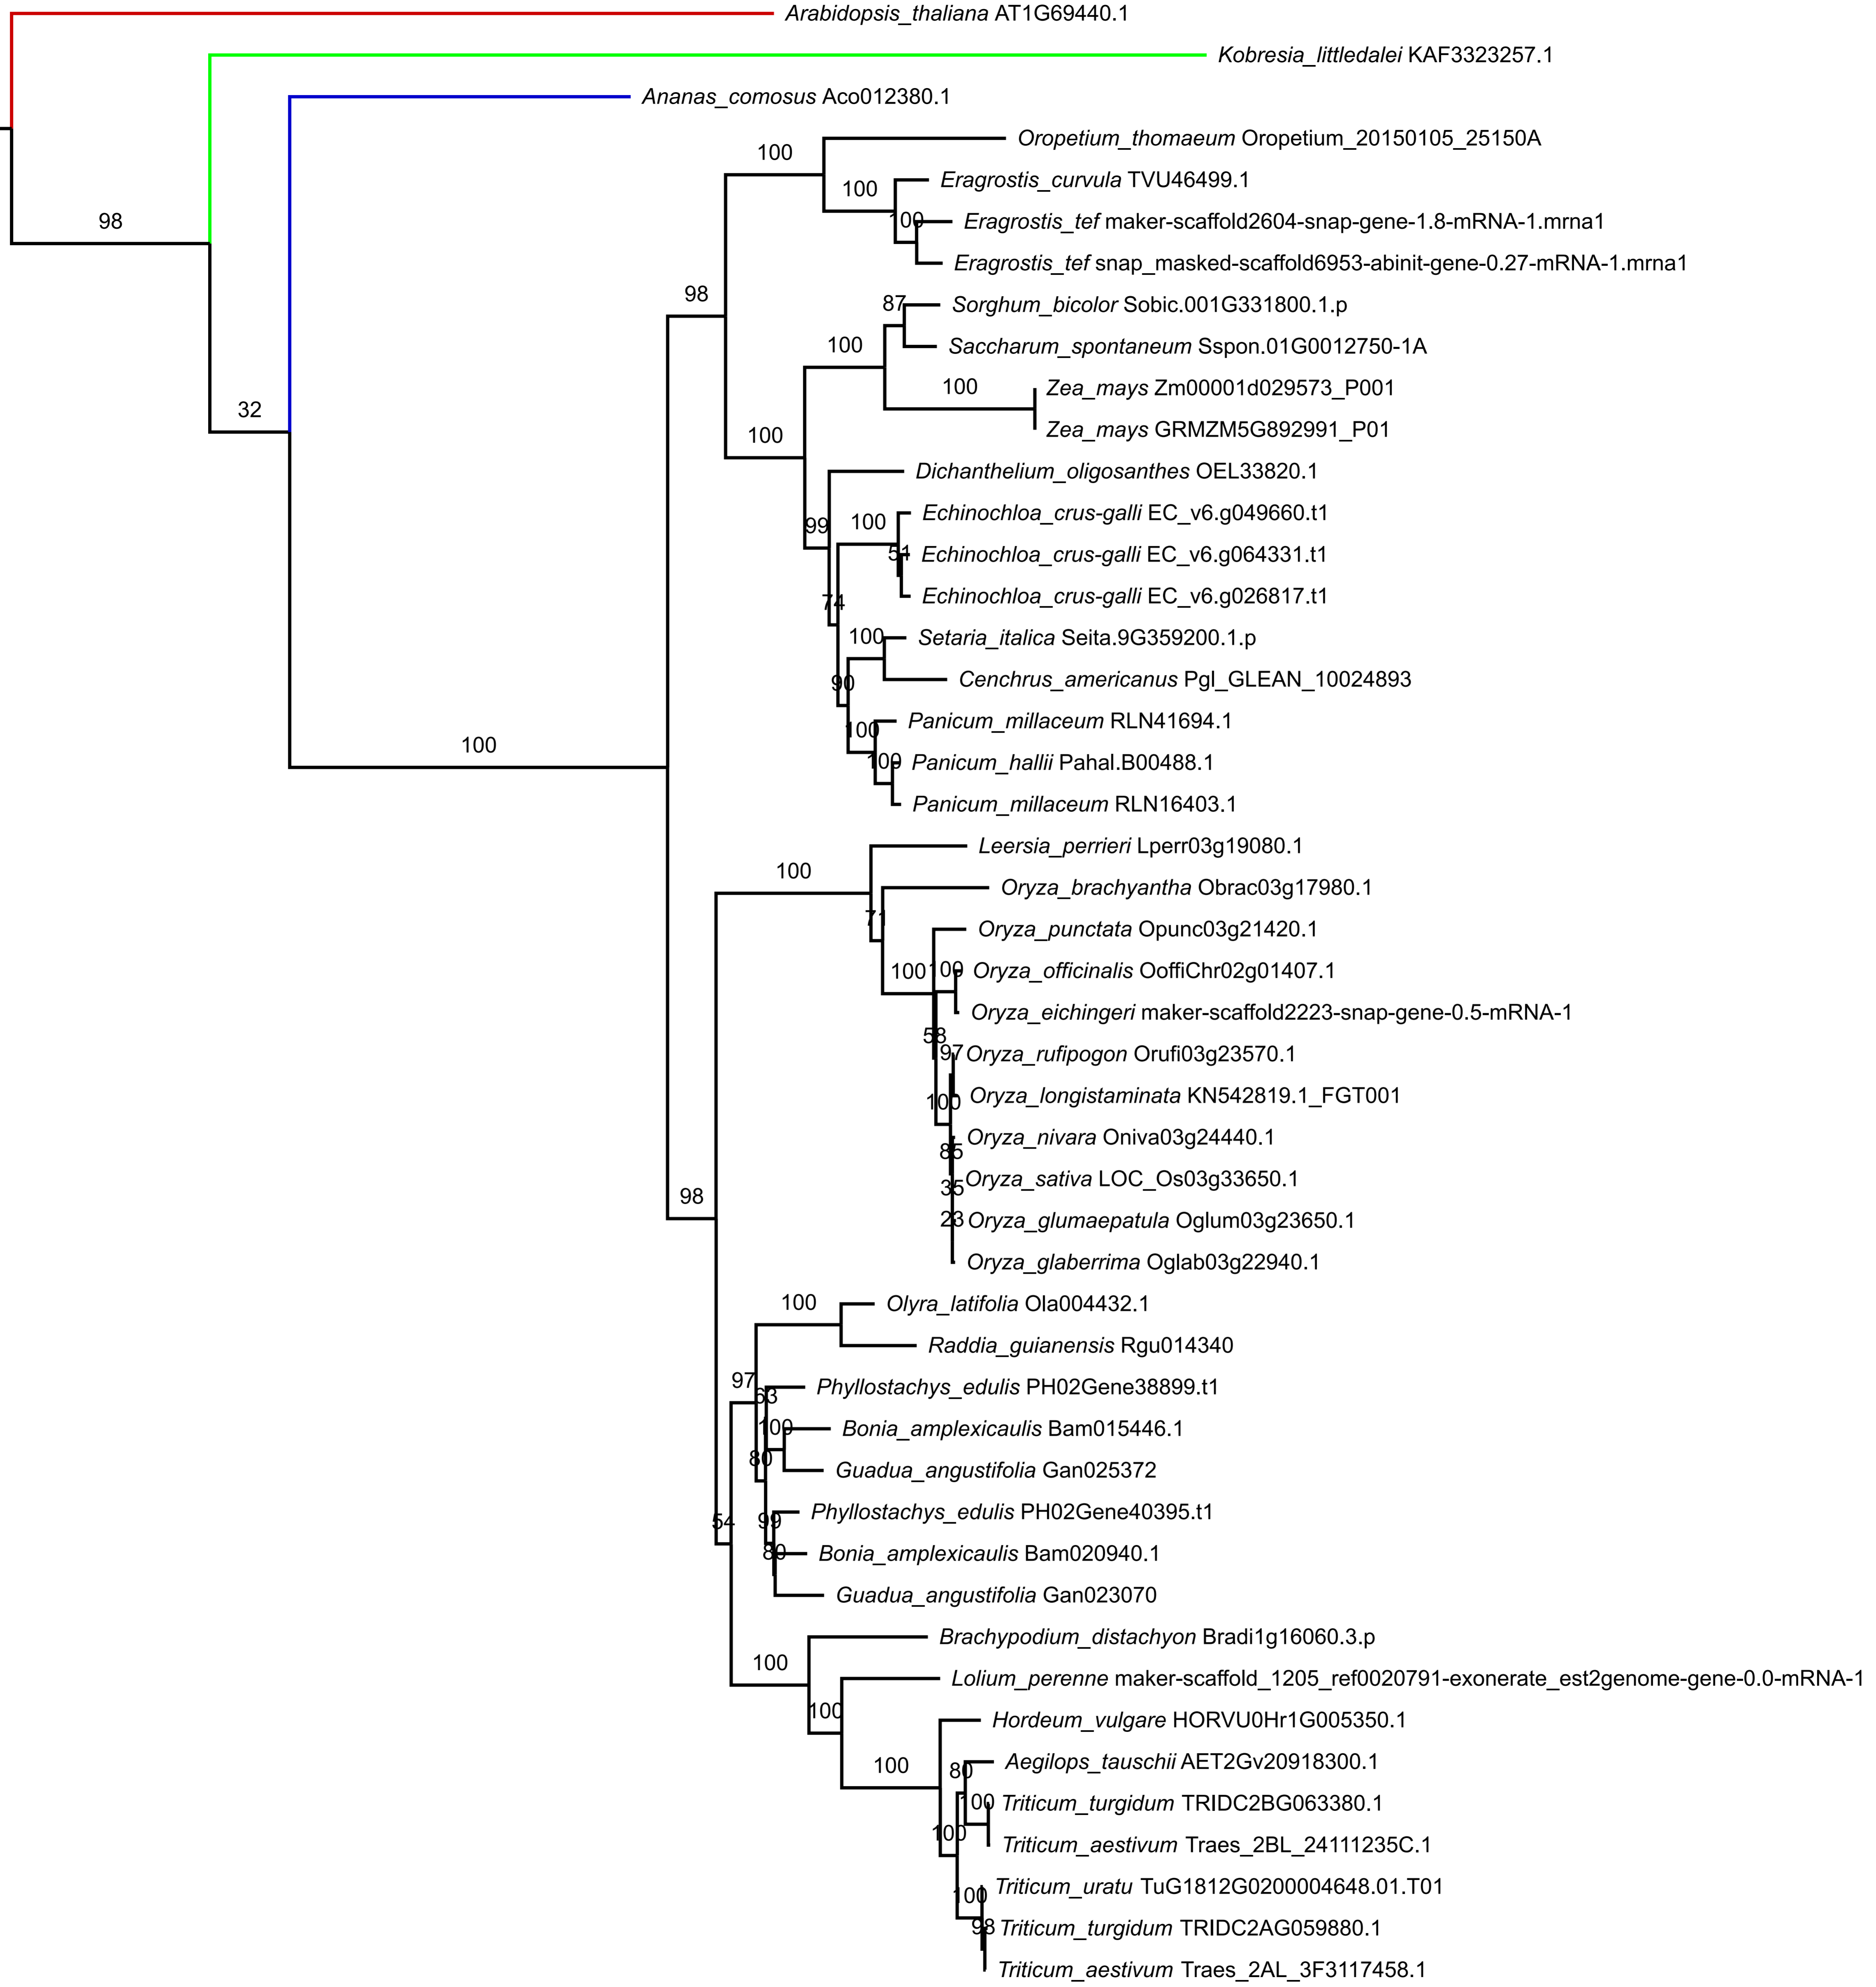

0.06

E

Arabidopsis\_thaliana AT2G27880.1  
Ananas\_comosus Aco017433.1

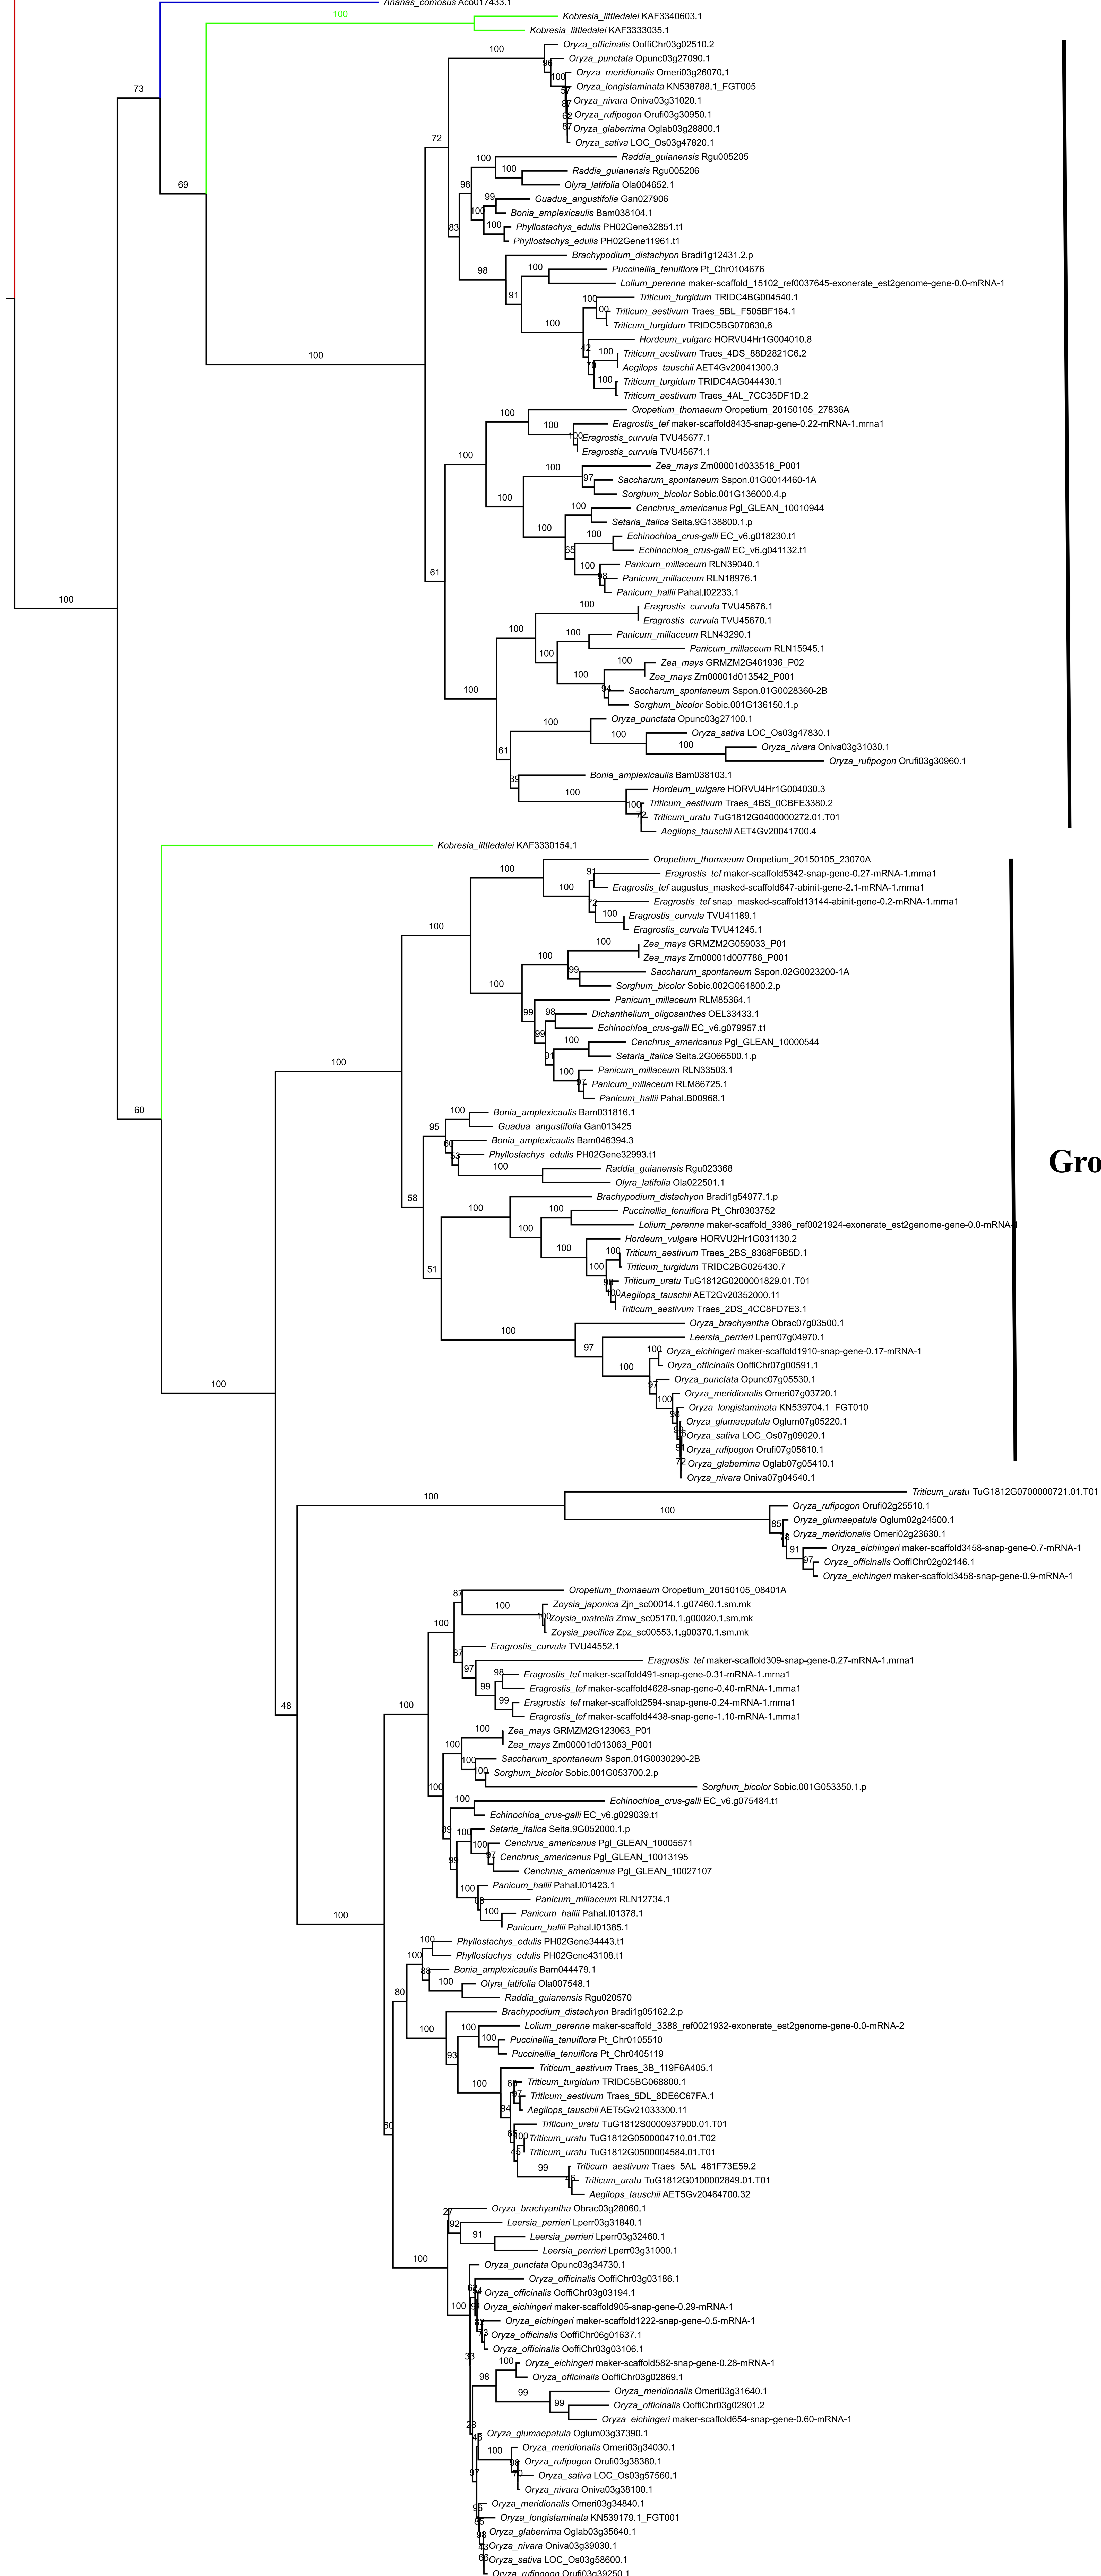

Group I

Group II

Group III

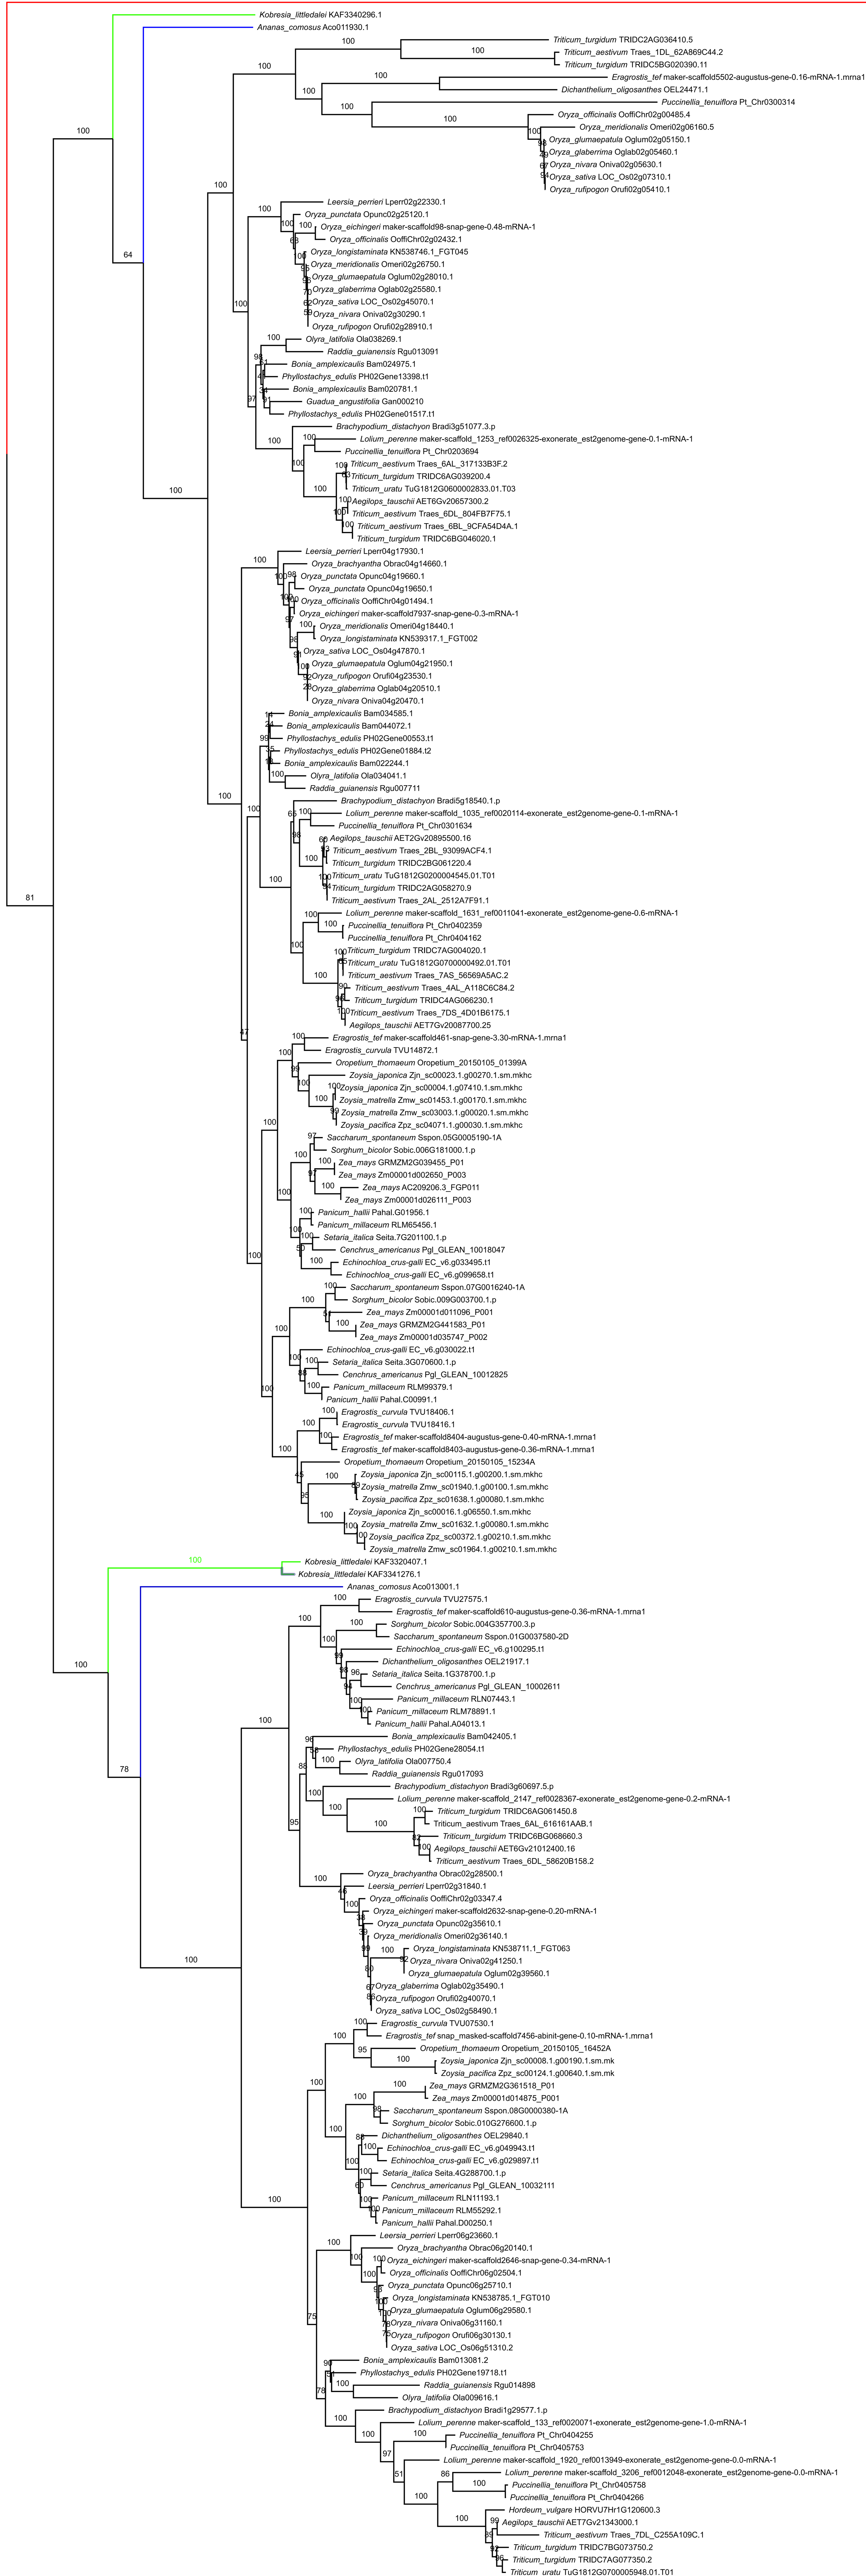

## Monocots-Group I

## Monocots-Group II

G

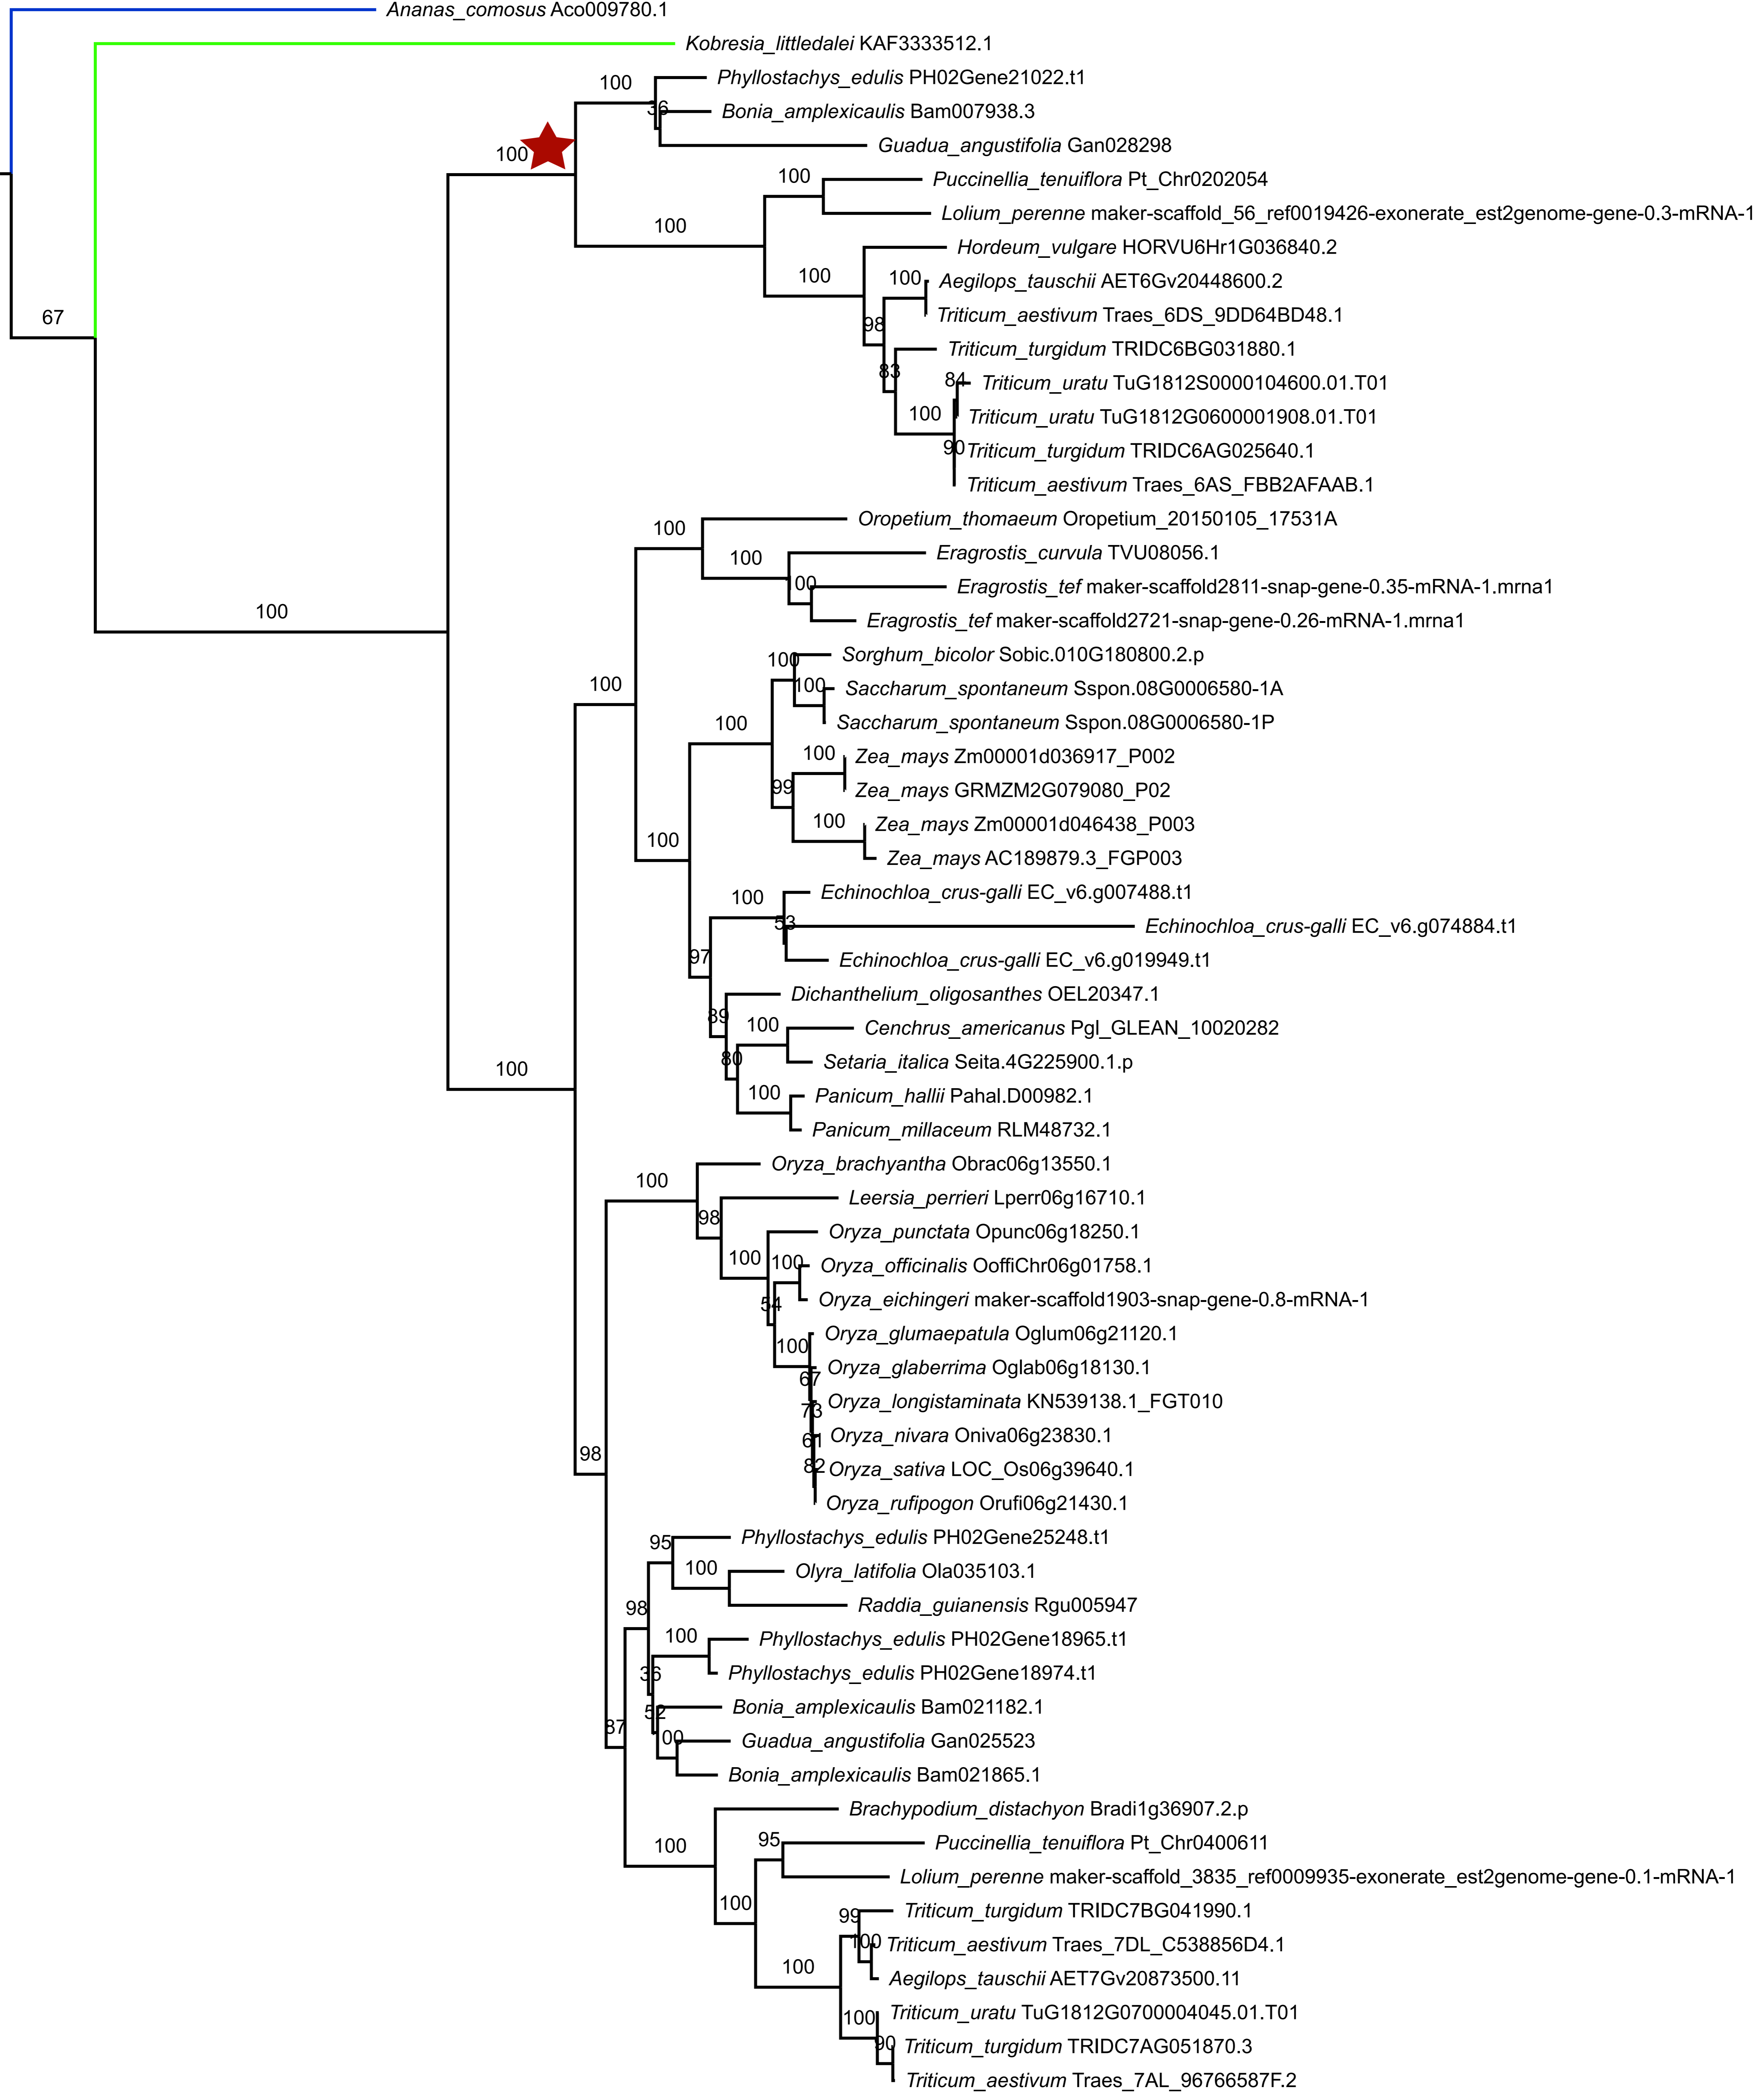

0.04
