# Supplementary material
Source: PubMed Central journal article supplement (PMC9208301)

**A**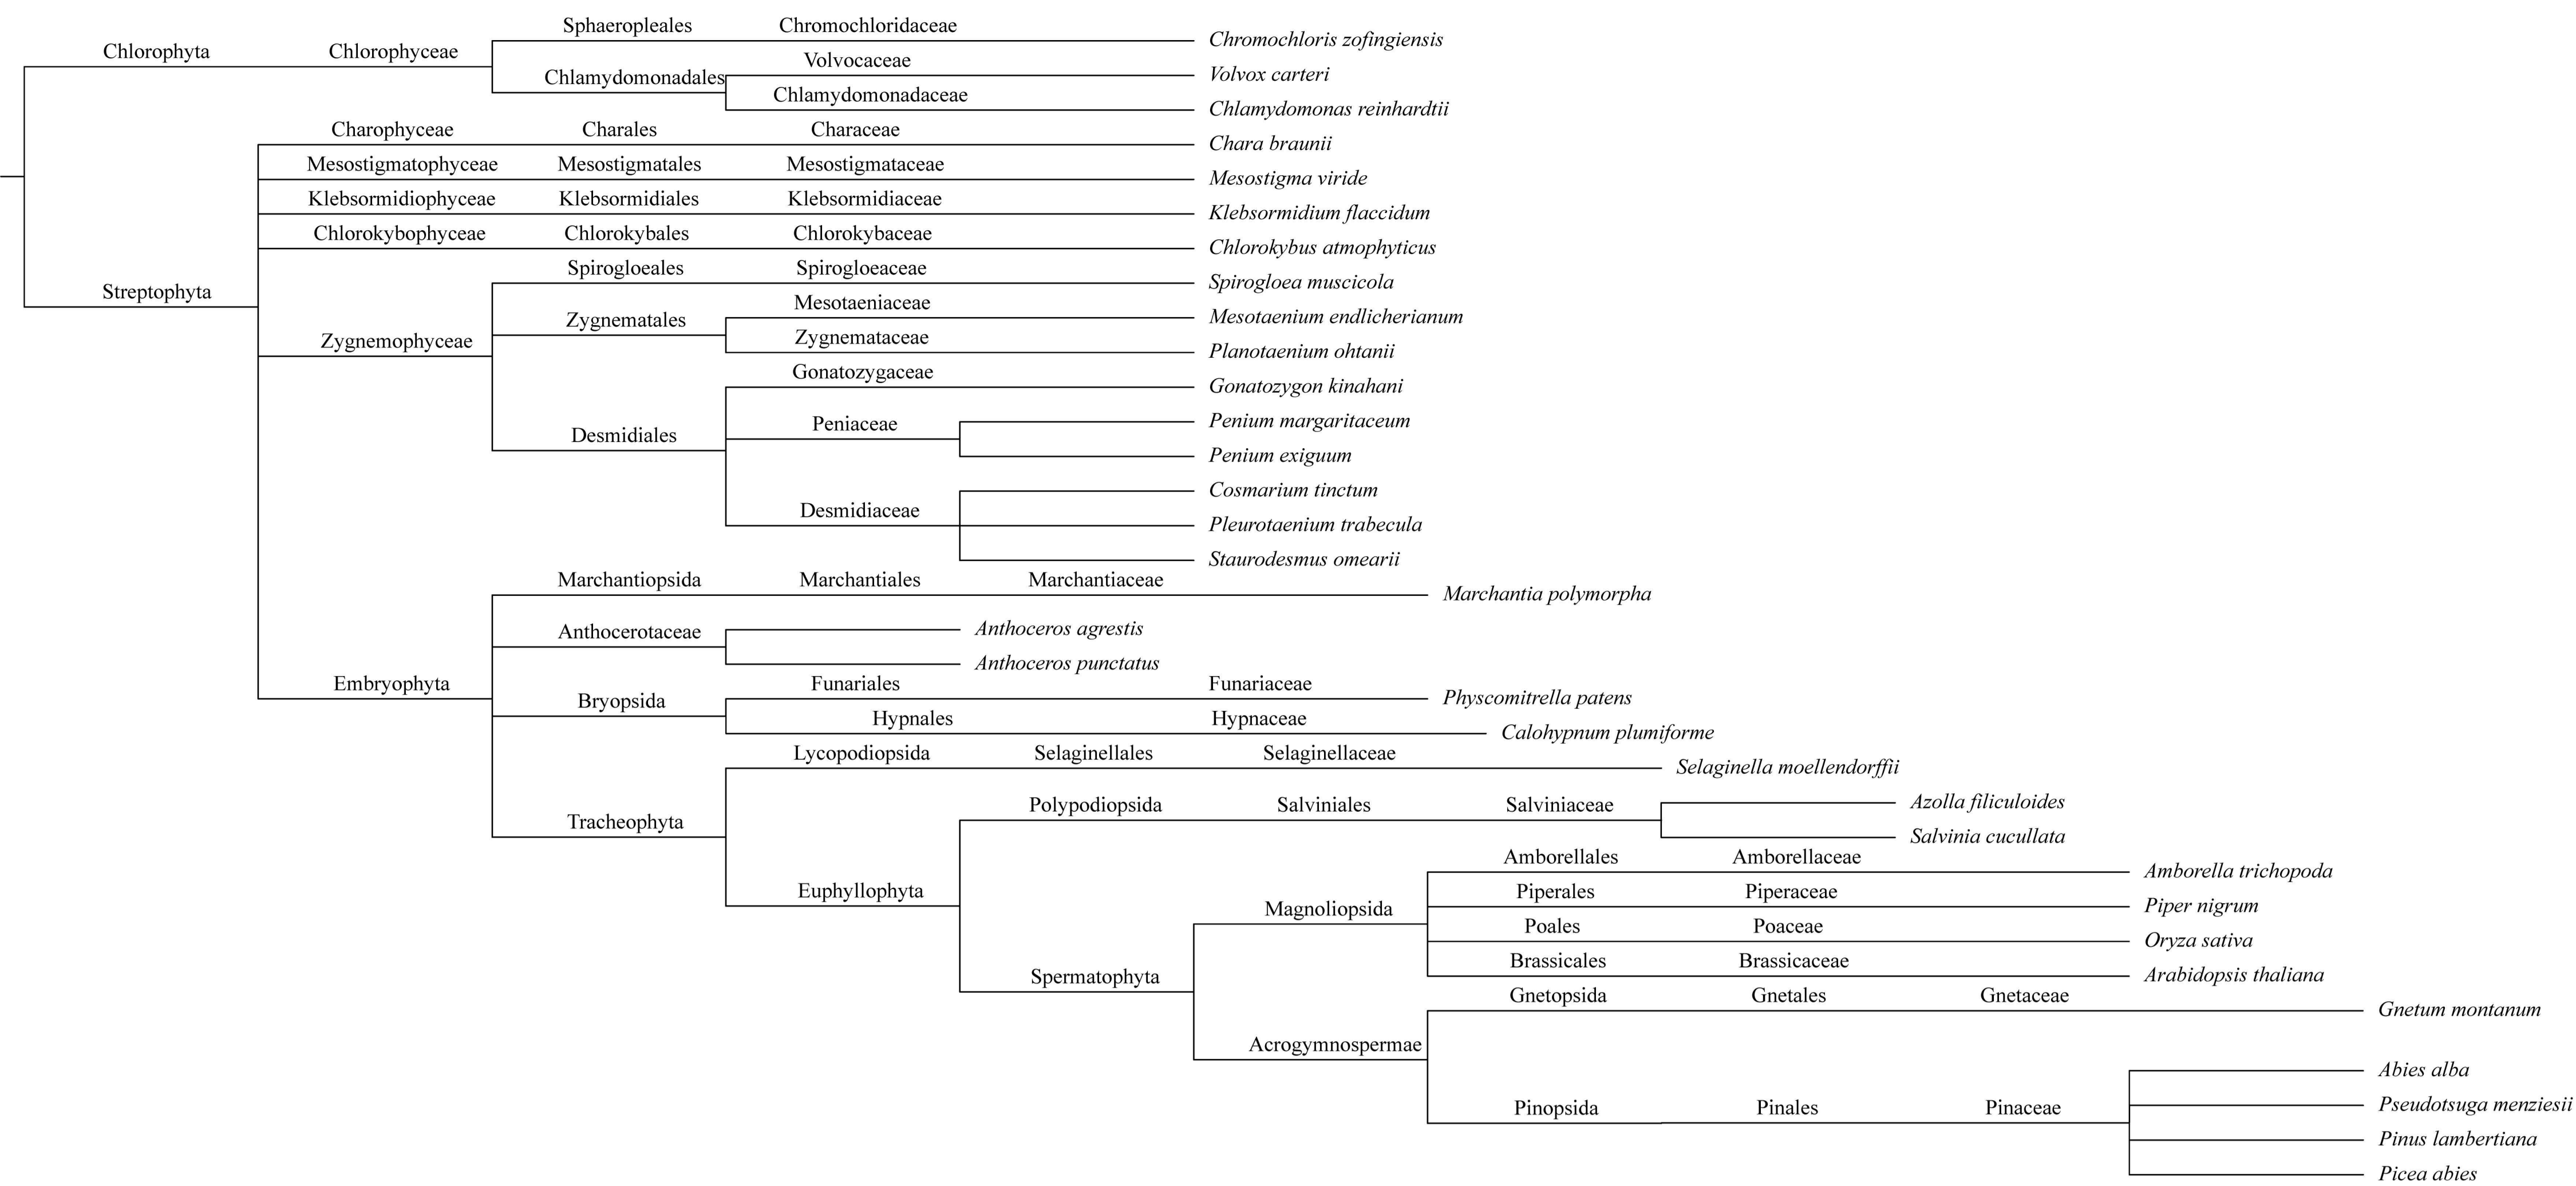**B**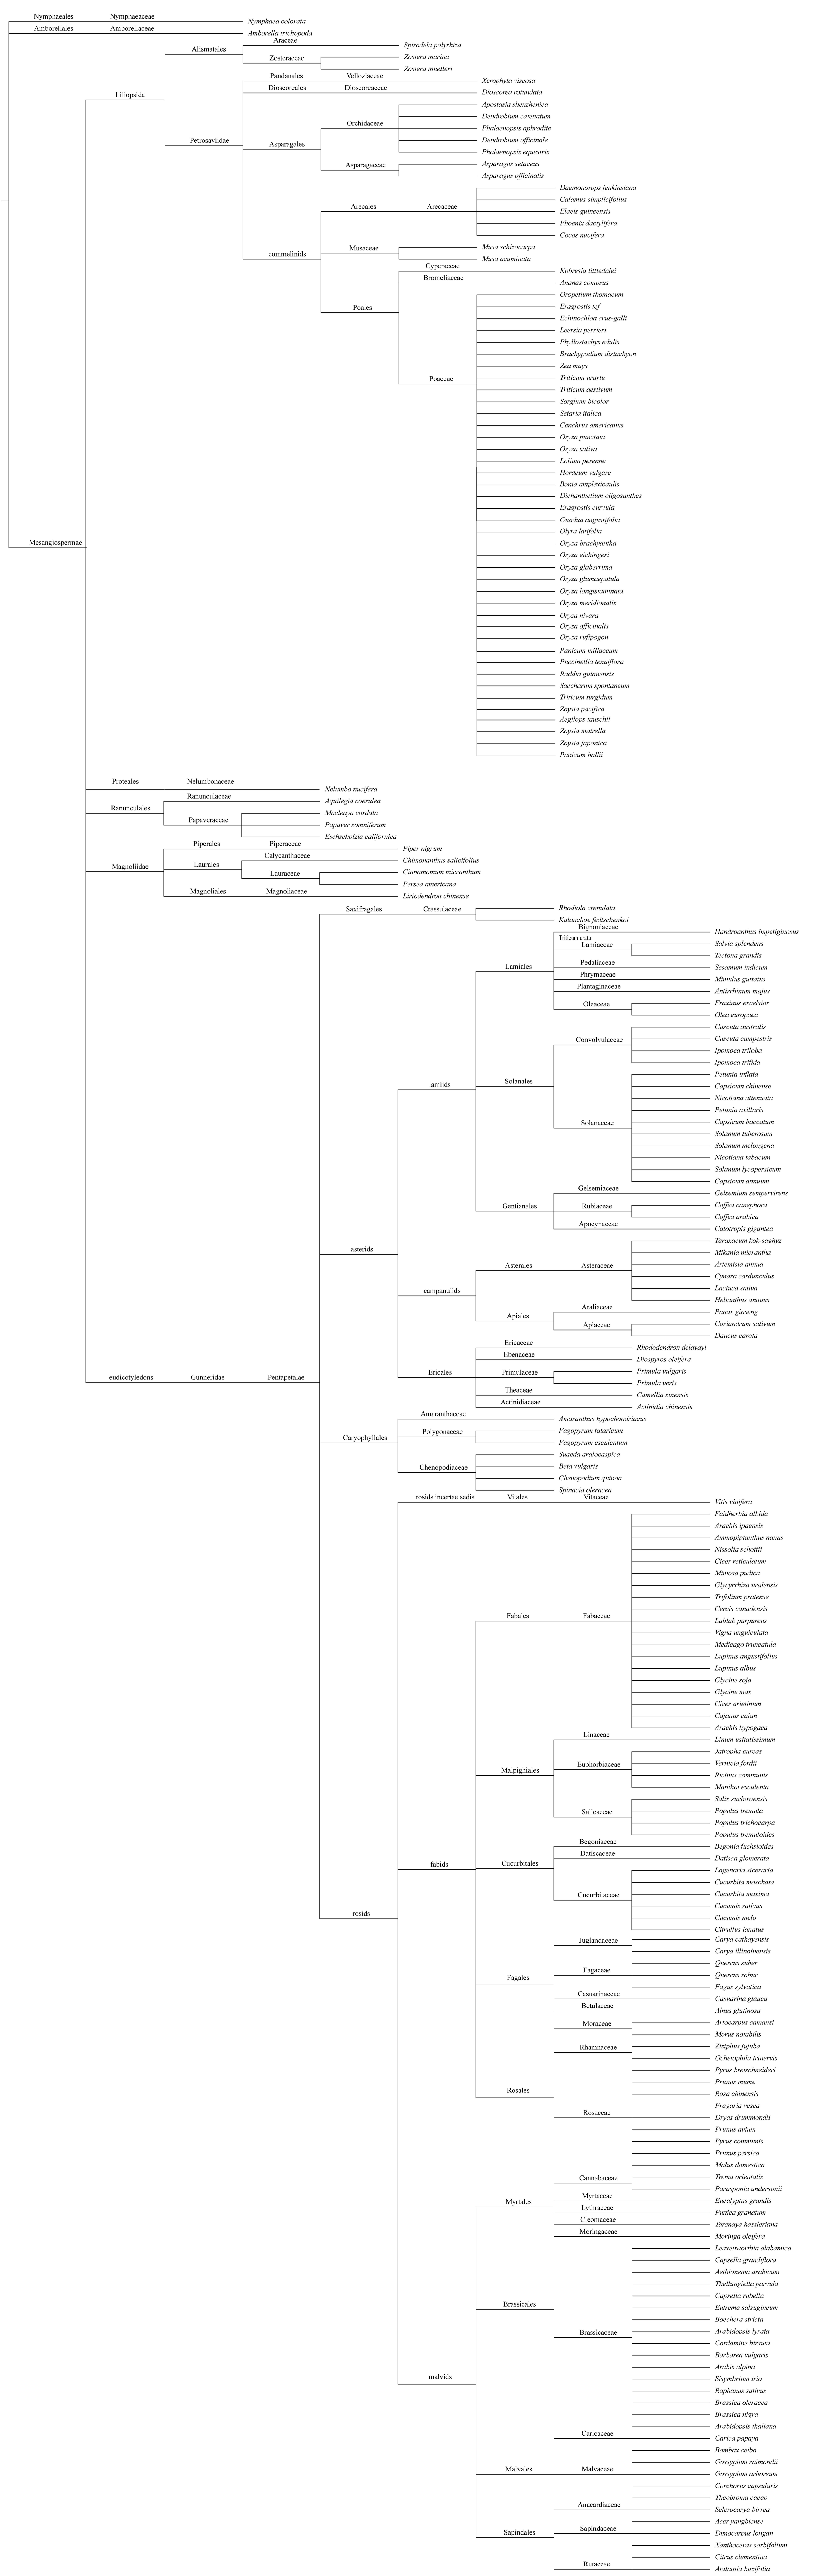

Supplement: NIHMS1814611-supplement-Figure_S1.pdf [file NIHMS1814611-supplement-Figure_S1.pdf]

# Ago-like family

# PIWI family

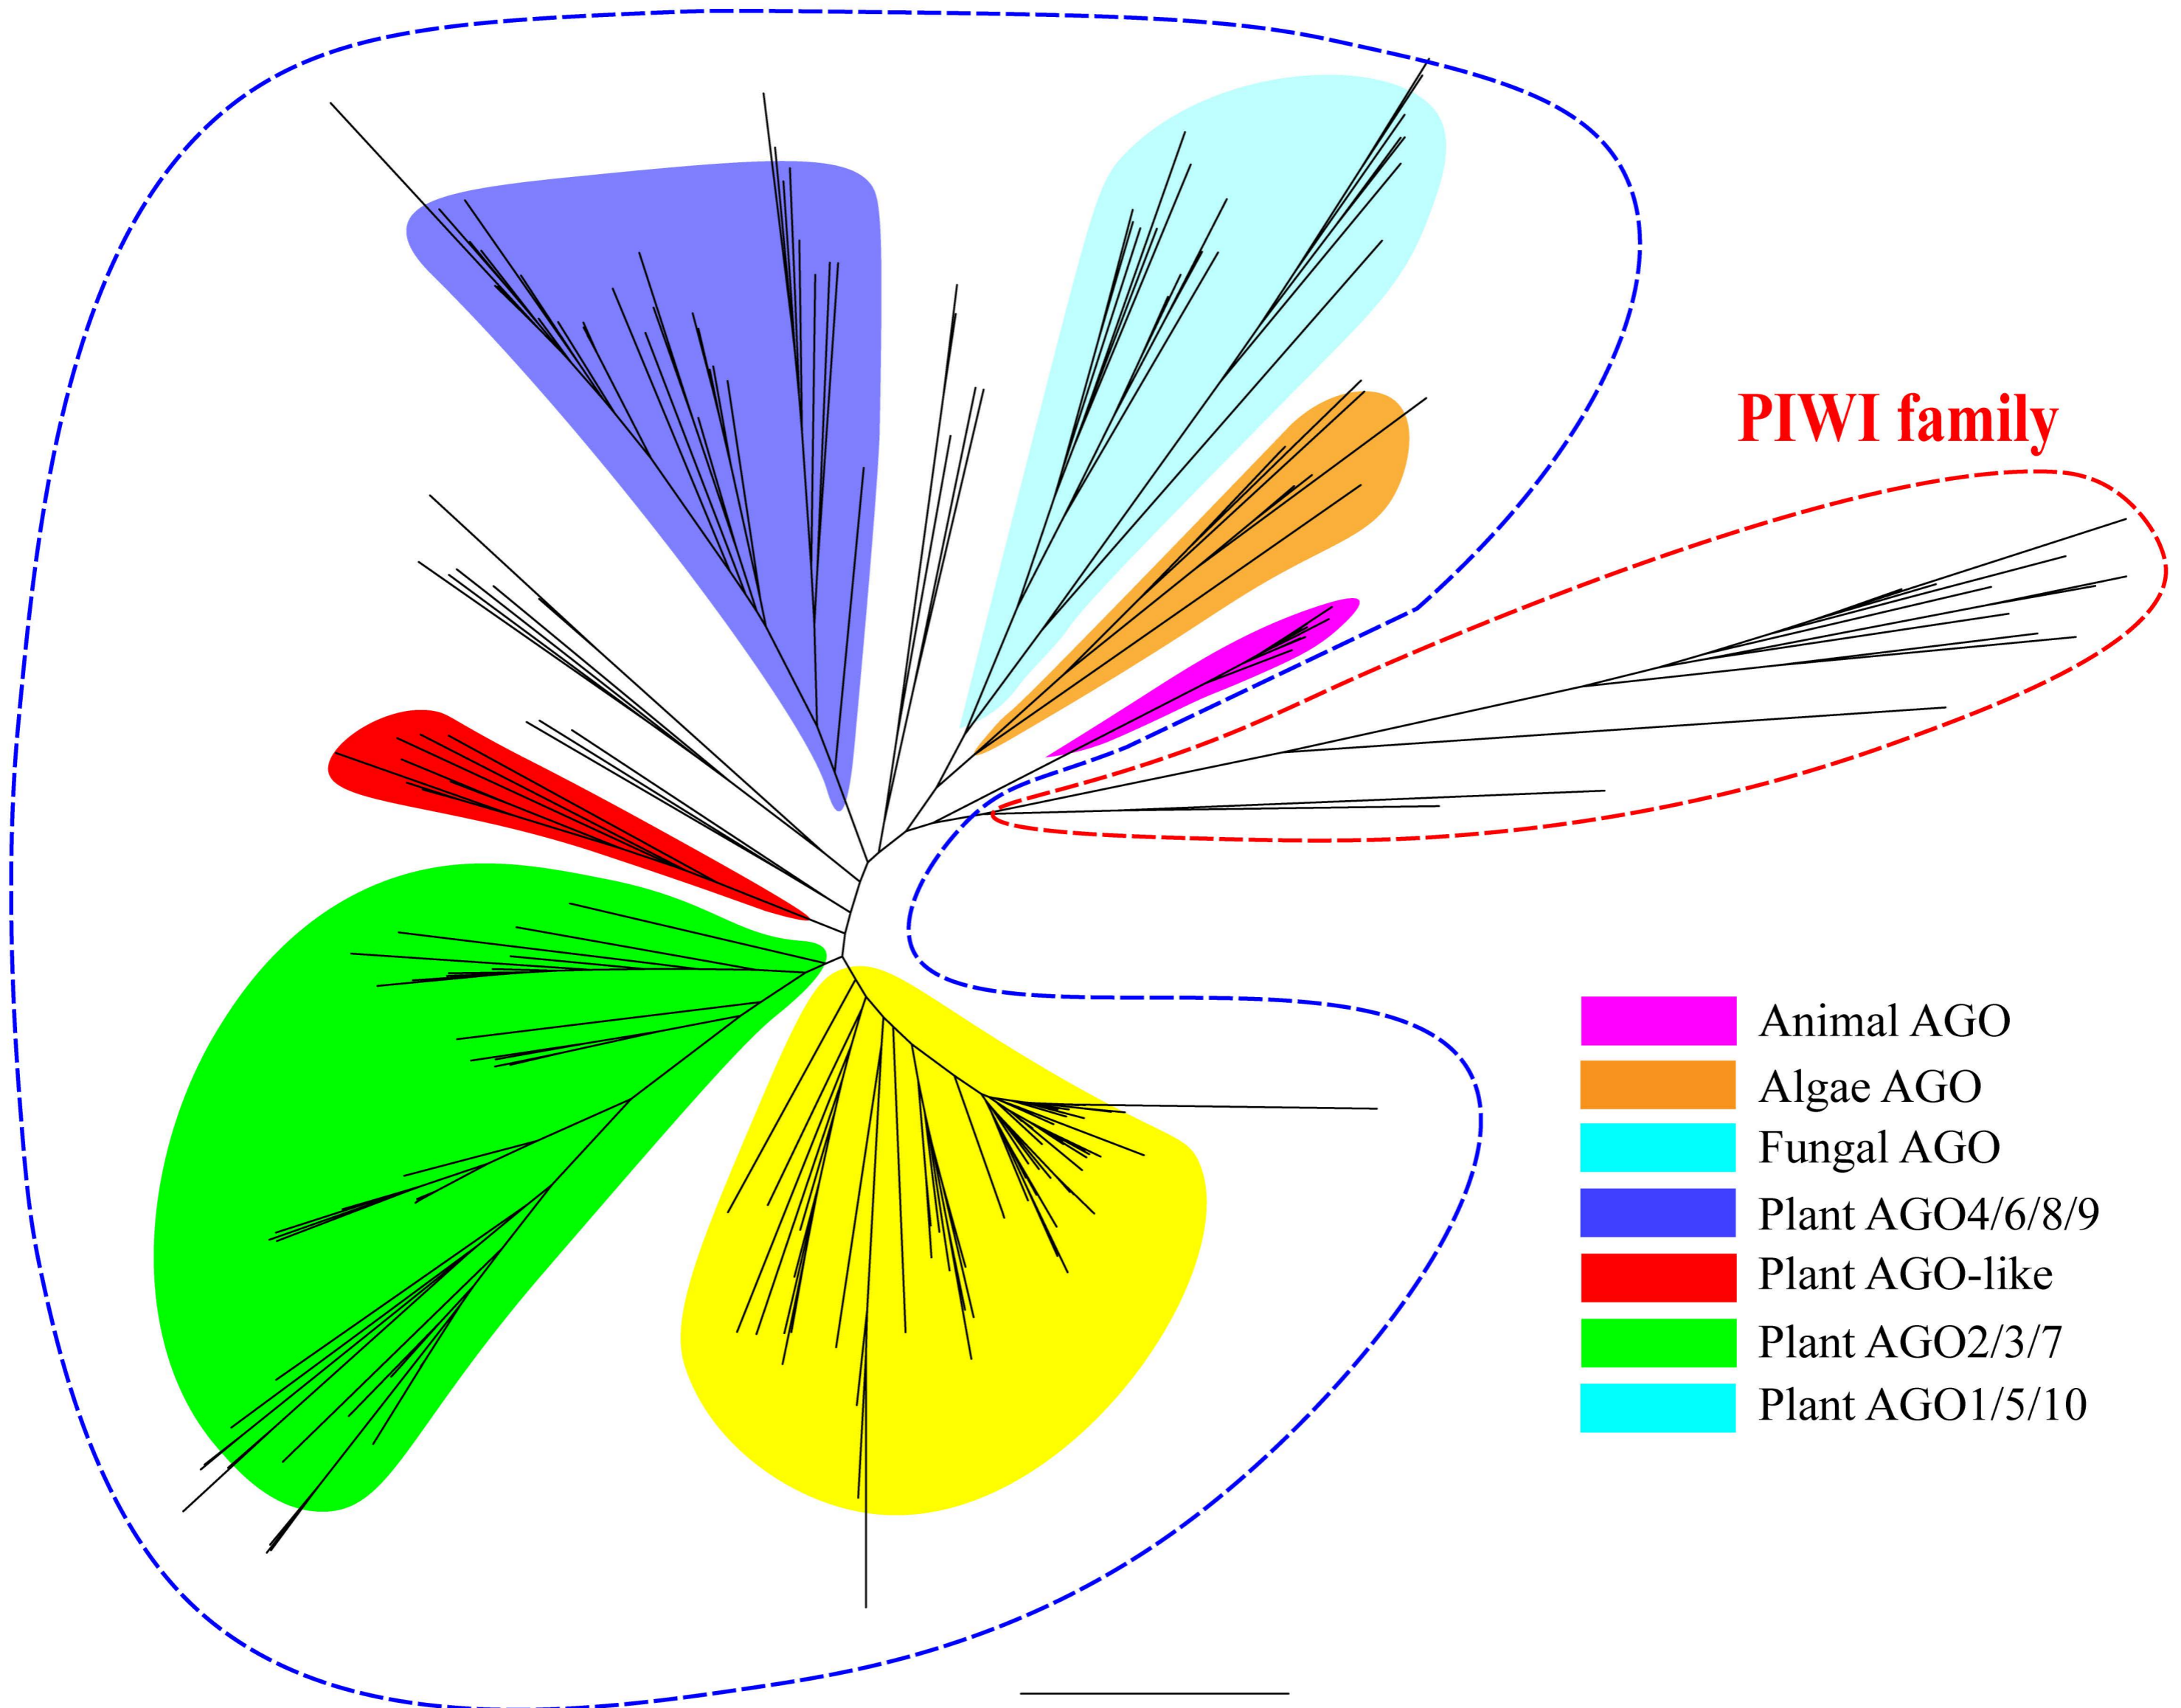

Supplement: NIHMS1814611-supplement-Figure_S2.pdf [file NIHMS1814611-supplement-Figure_S2.pdf]

# AGO4/6/8/9

## Chlorophytic AGO

## AGO-like

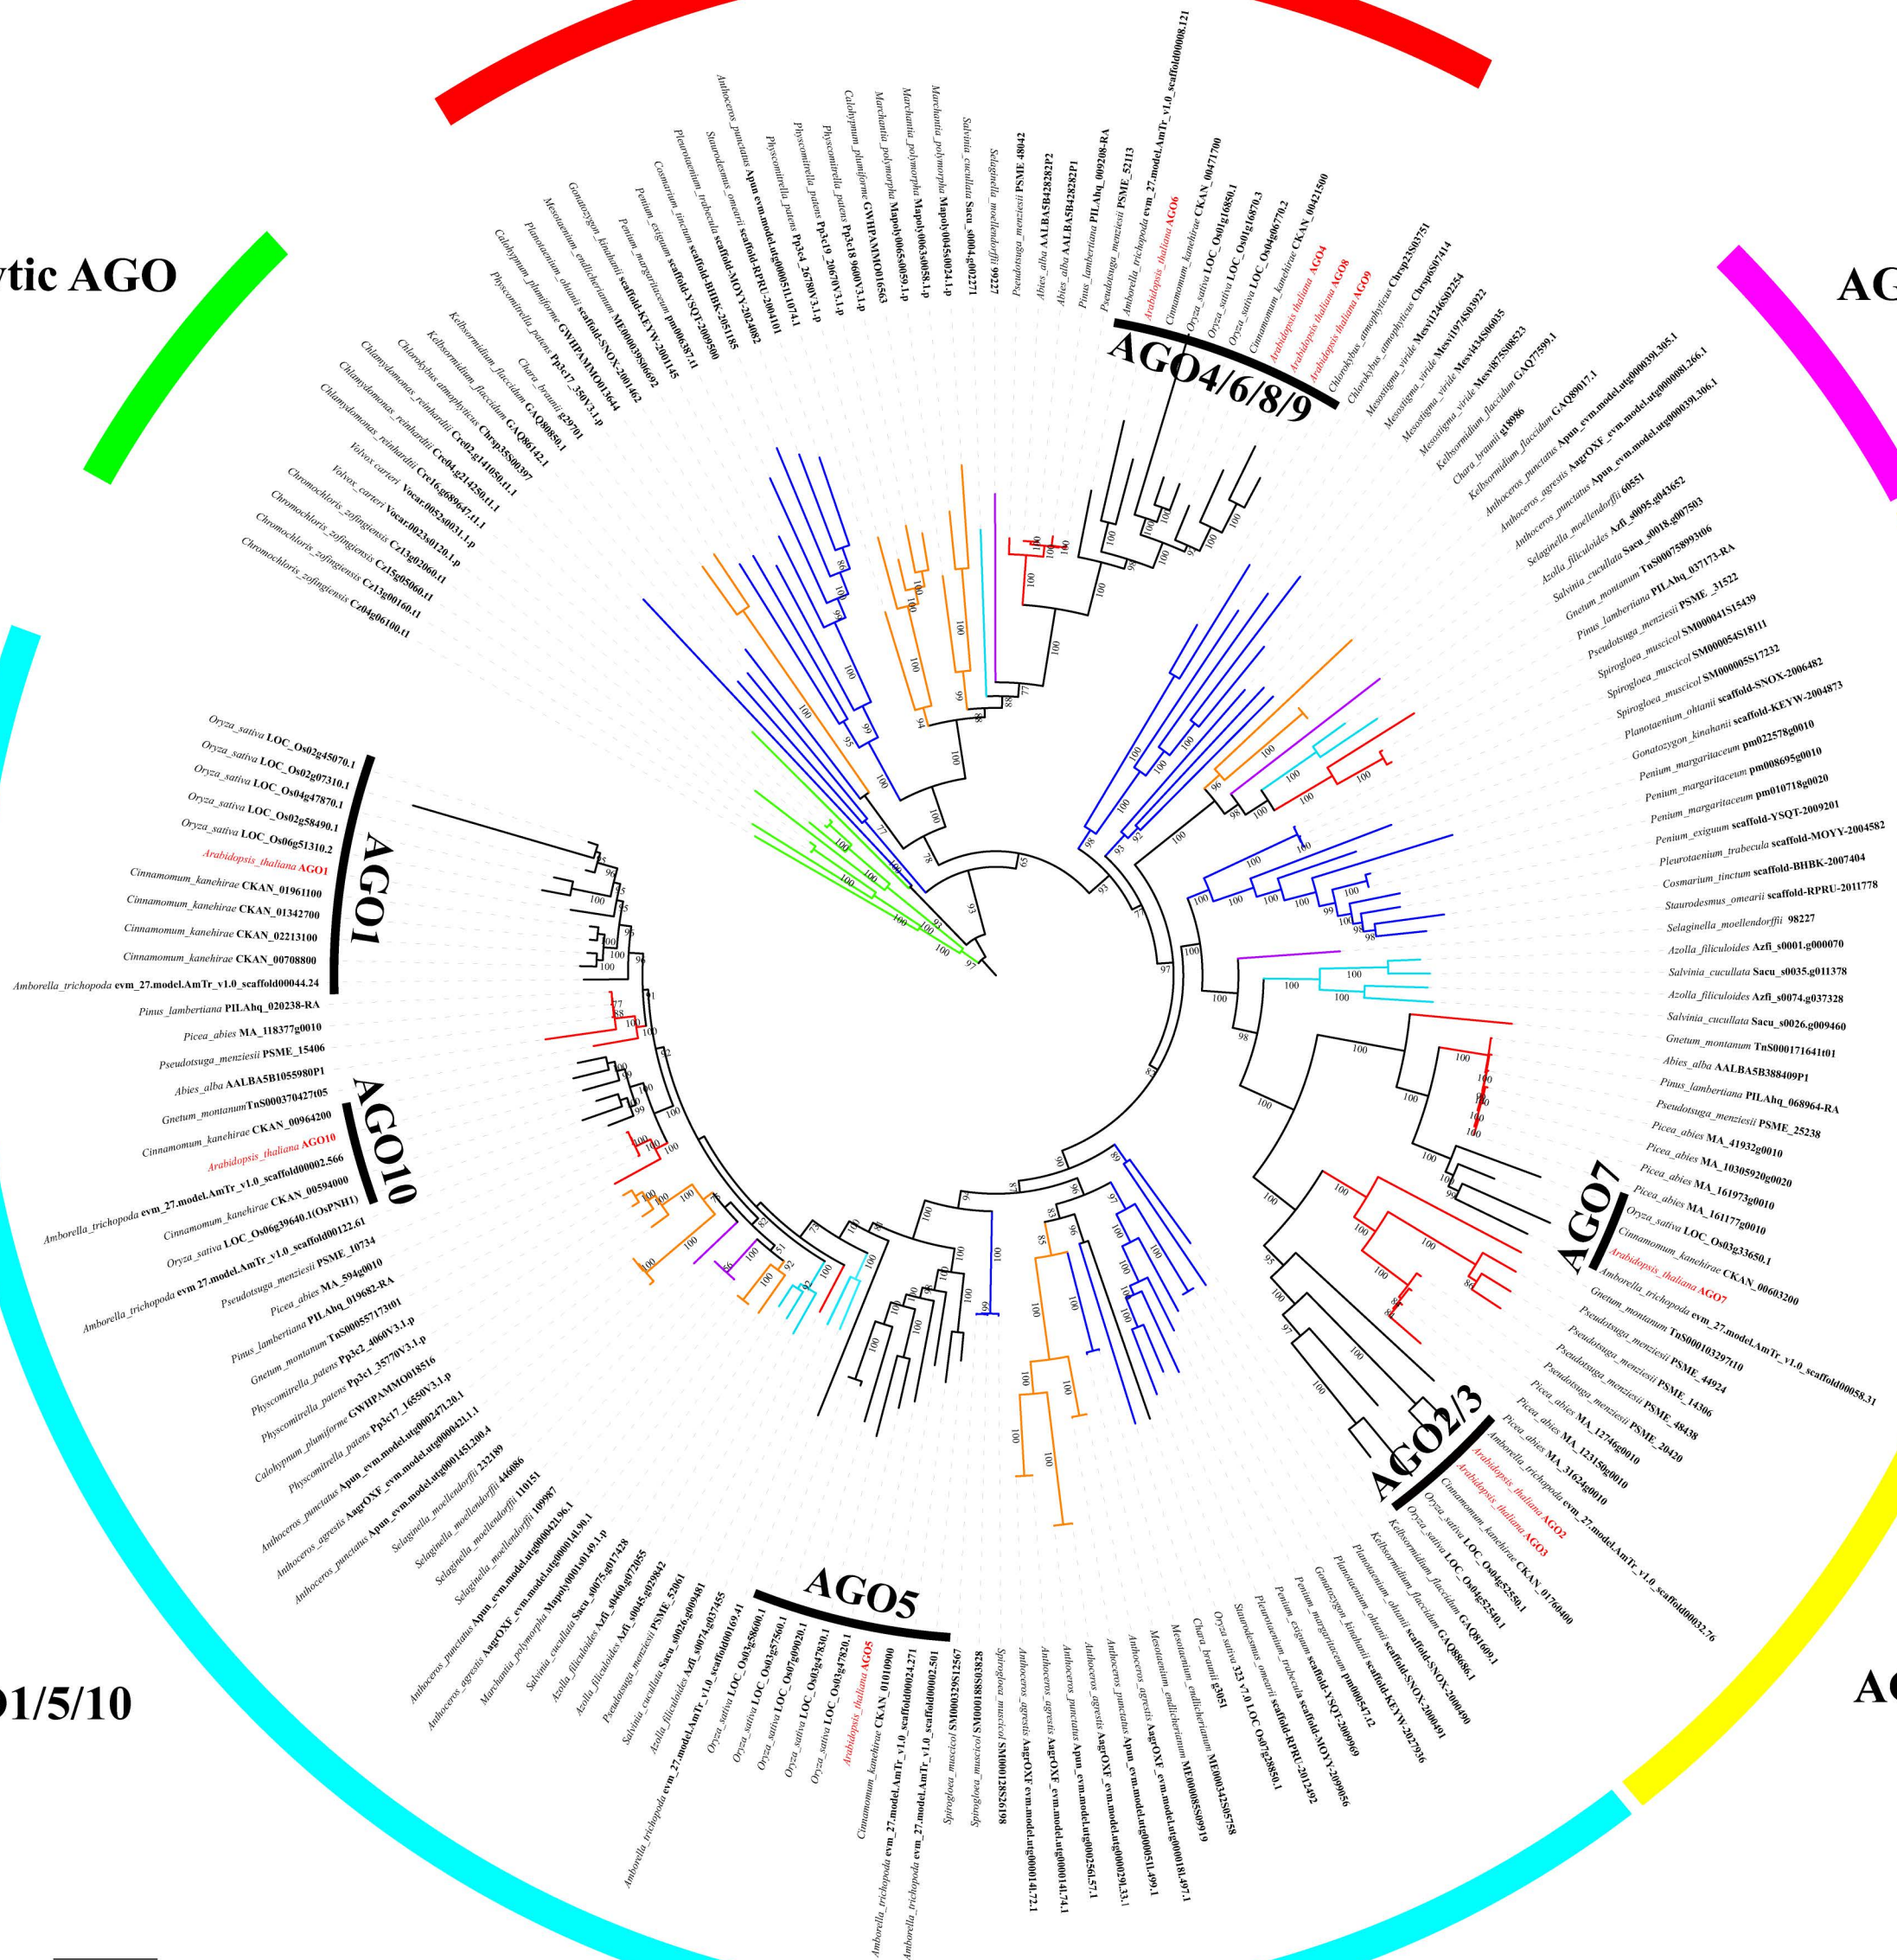

Supplement: NIHMS1814611-supplement-Figure_S3.pdf [file NIHMS1814611-supplement-Figure_S3.pdf]

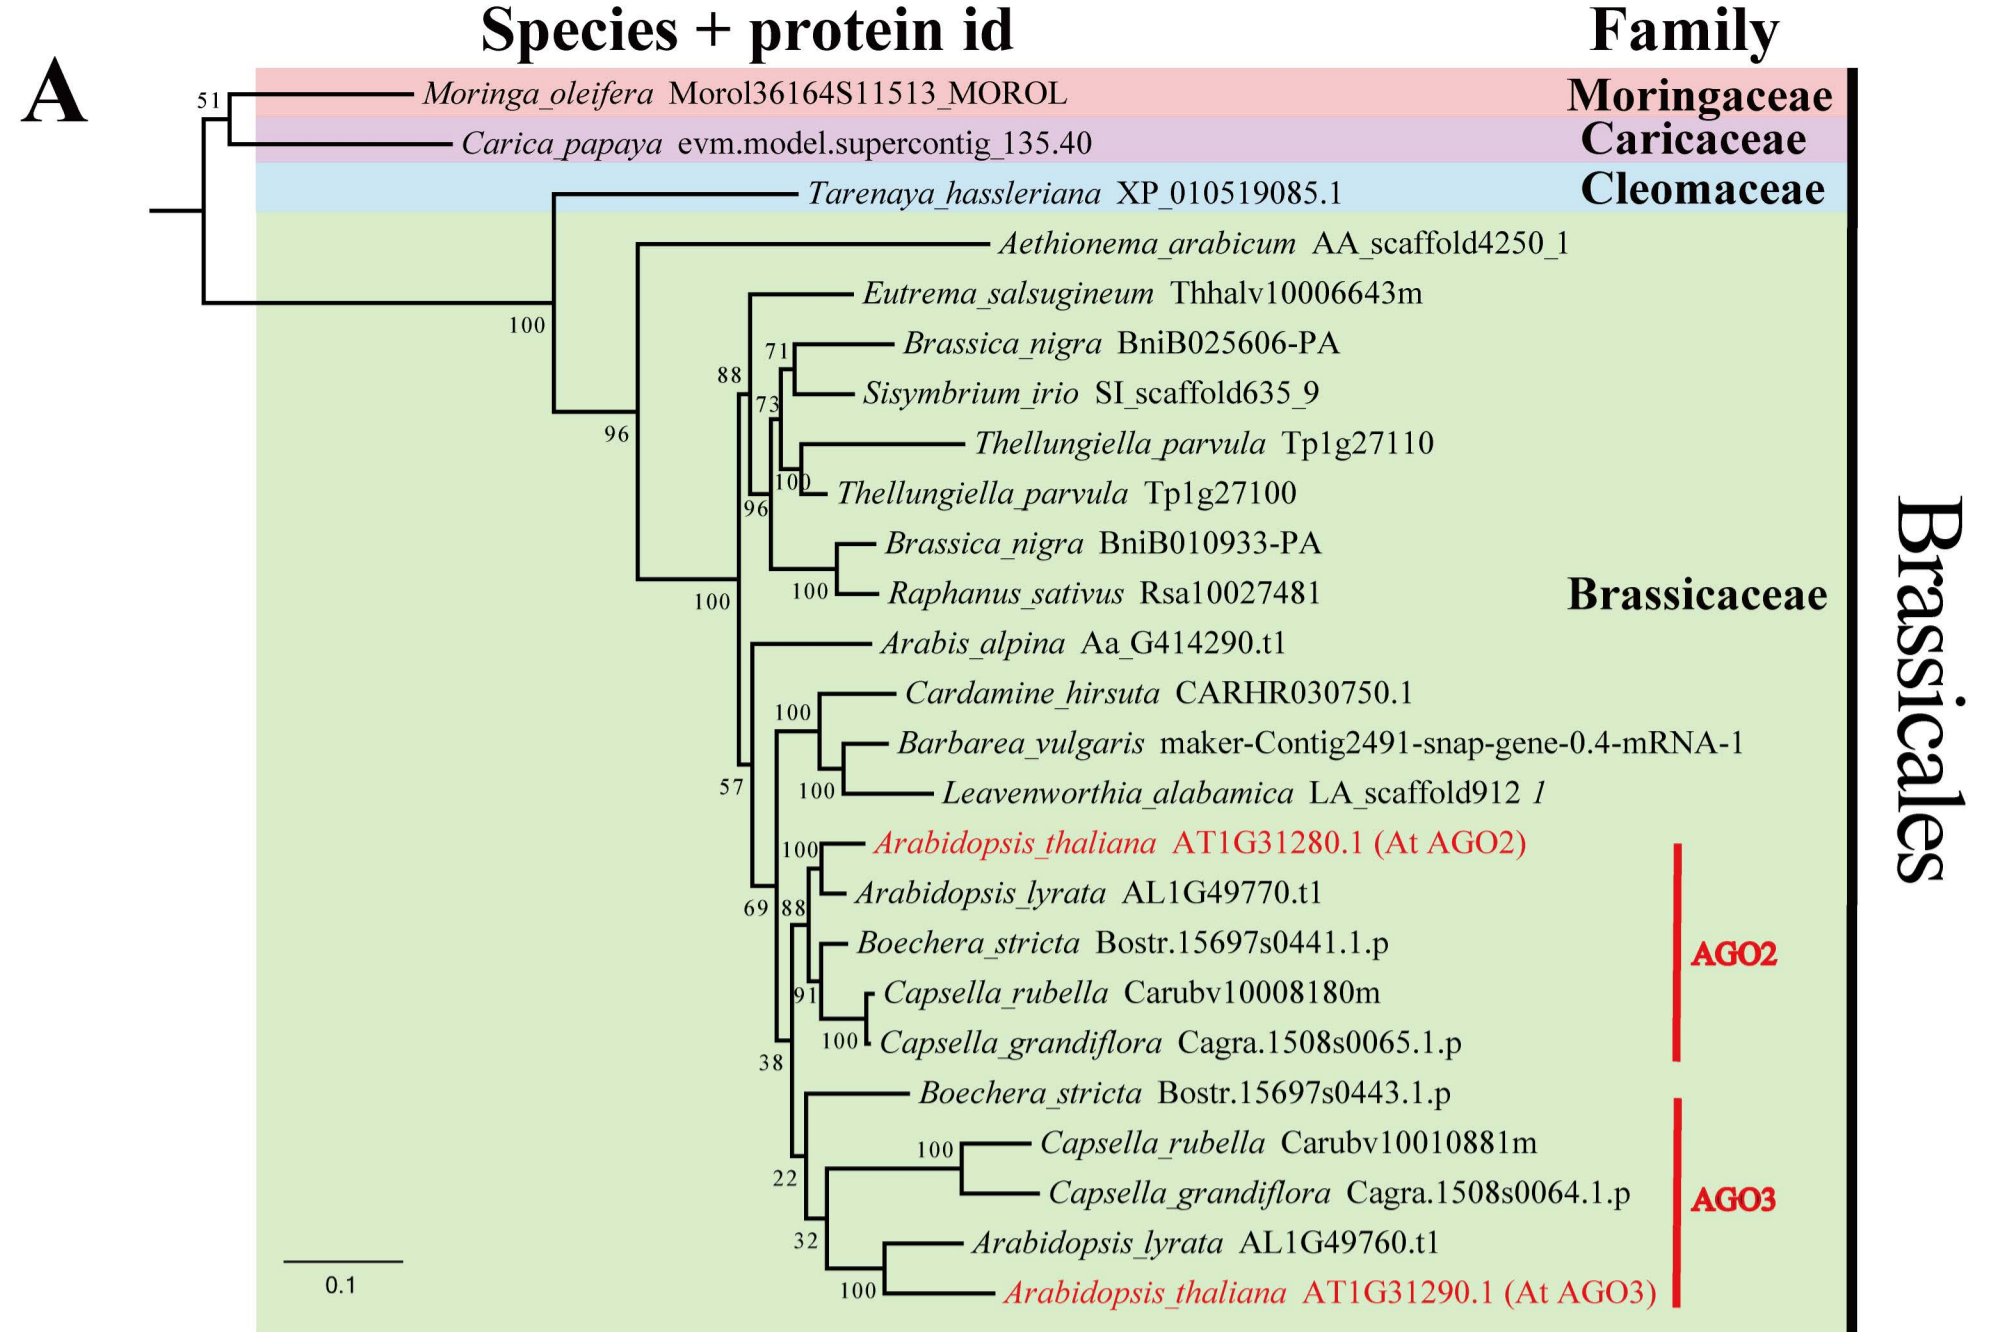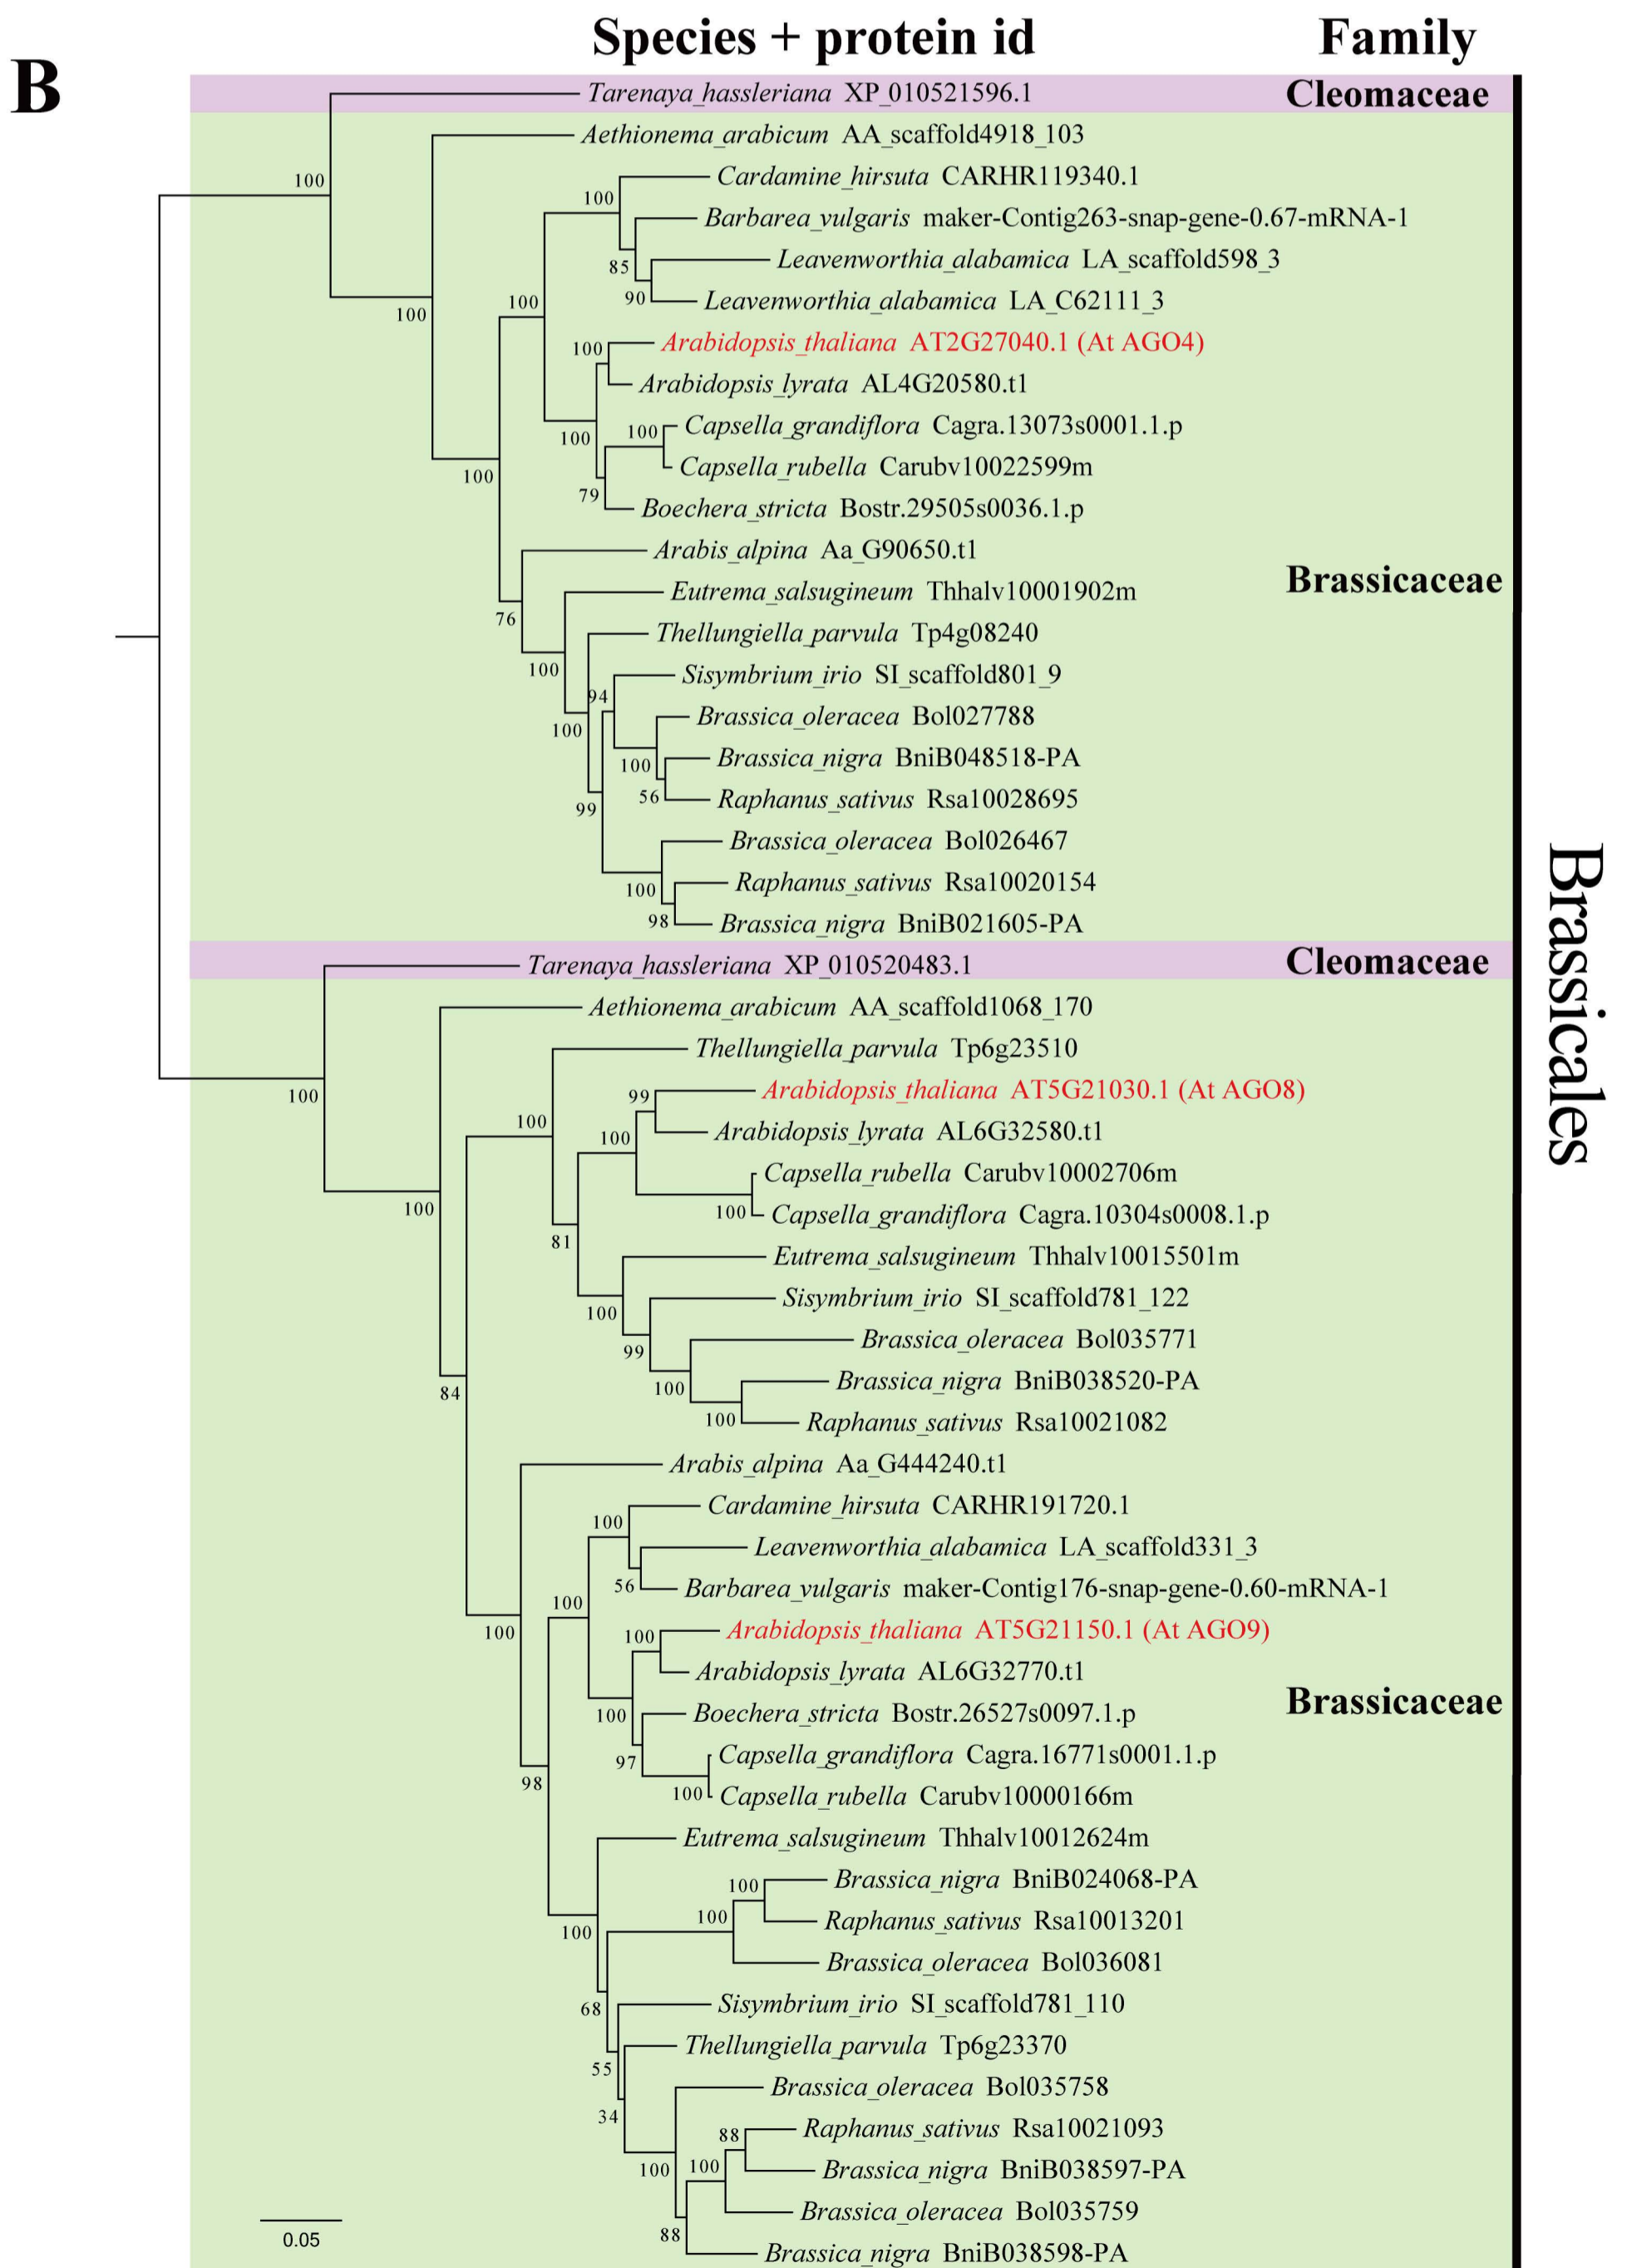

Supplement: NIHMS1814611-supplement-Figure_S5.pdf [file NIHMS1814611-supplement-Figure_S5.pdf]

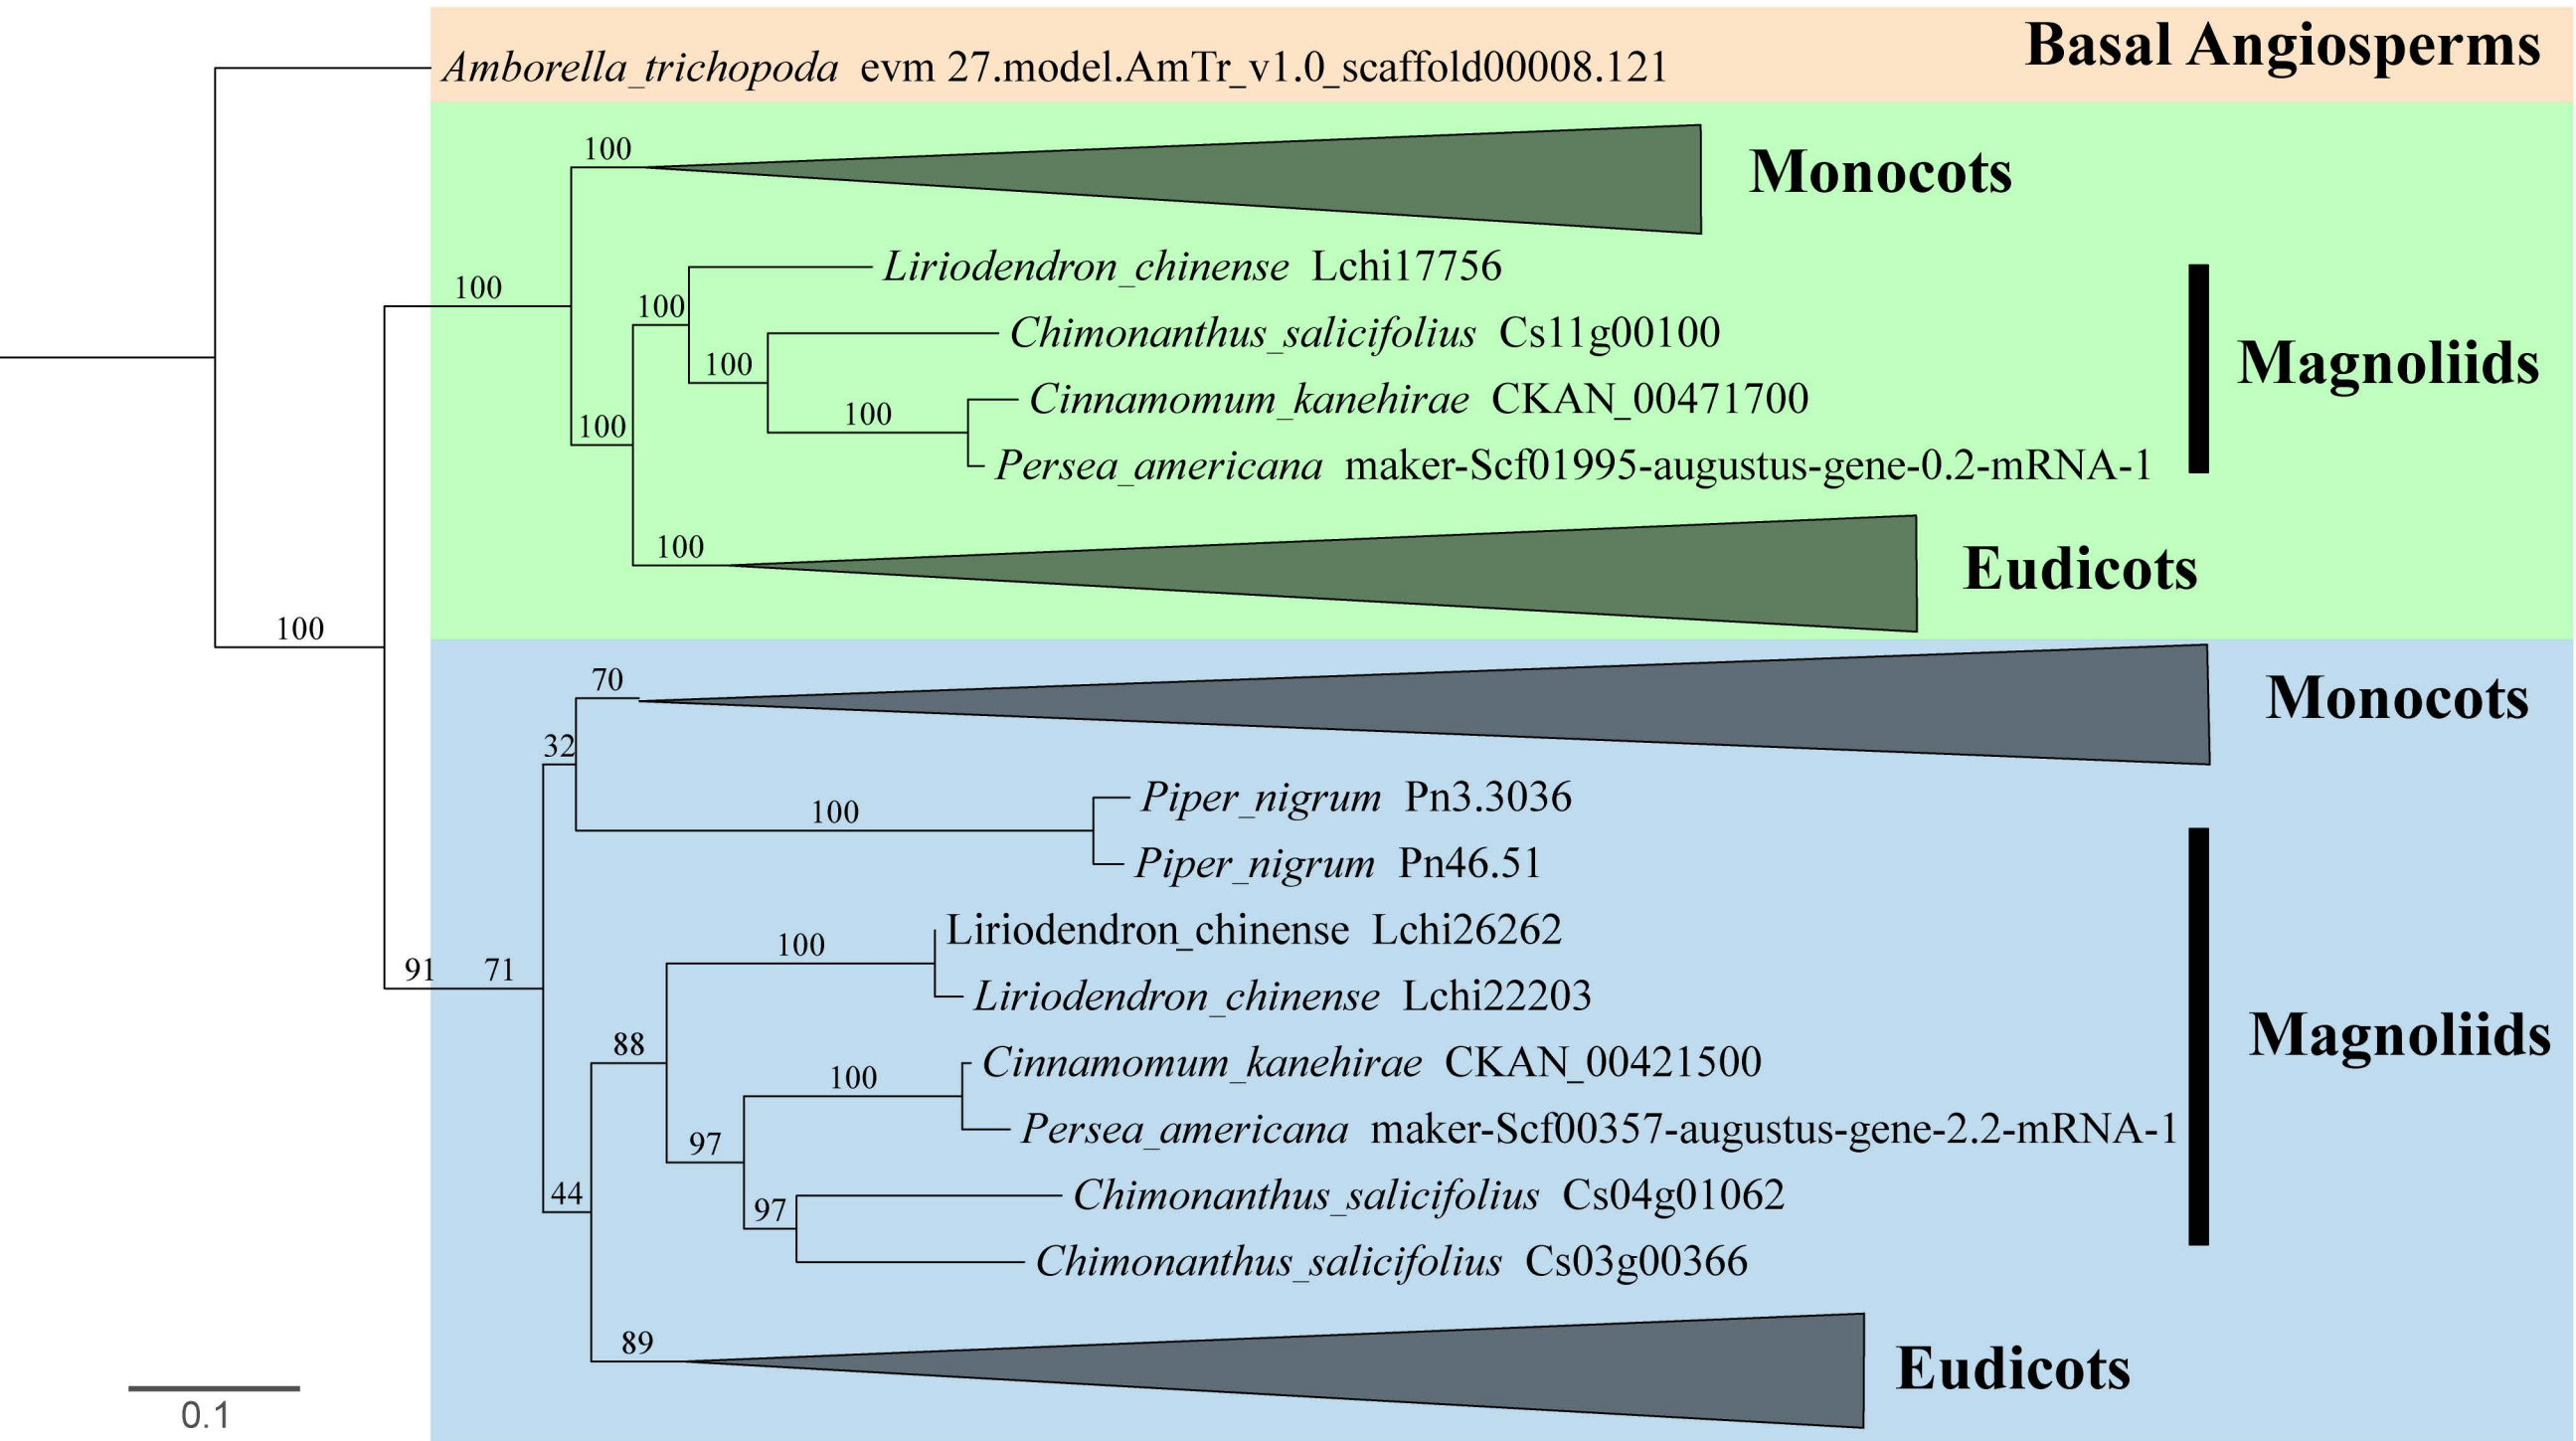

AGG06

AGG04

Supplement: NIHMS1814611-supplement-Figure_S6.pdf [file NIHMS1814611-supplement-Figure_S6.pdf]
